# Supplementary material for: Meta-analysis of cognitive functioning in patients with psychotic disorders and obsessive–compulsive symptoms
Source: Springer Nature journal article supplement (doi:10.1007/s00406-020-01174-3), 2020-08-11
Supplement: MOESM1 [file 18266838]

## Supplemental material

*Meta-analysis of cognitive functioning in patients with psychotic disorders and obsessive-compulsive symptoms.*

*European Archives of Psychiatry and Clinical Neuroscience. Lotte Dijkstra, Jentien Vermeulen, Lieuwe de Haan,*

*Frederike Schirmbeck. Amsterdam UMC. Email: n.f.schirmbeck@amsterdamumc.nl.*

### *Table of Contents*

|                                                             |    |
|-------------------------------------------------------------|----|
| 1. Reference set of articles and conference abstracts ..... | 2  |
| 2. Search terms .....                                       | 5  |
| 3. Data extraction form .....                               | 11 |
| 4. Result aggregation .....                                 | 12 |
| 5. Quality assessment .....                                 | 15 |
| 6. Meta-analysis .....                                      | 17 |
| a. Meta-analysis overview table .....                       | 18 |
| b. Forest plots attention .....                             | 19 |
| c. Forest plots memory .....                                | 22 |
| d. Forest plots executive function .....                    | 29 |
| e. Forest plot facial affect recognition .....              | 41 |
| f. Forest plot visual spatial ability .....                 | 42 |
| 7. Confounders per subgroup .....                           | 43 |
| 8. Meta-regression tables .....                             | 45 |
| 9. Publication bias .....                                   | 49 |
| 10. Results not included in meta-analysis .....             | 50 |

## 1. Reference set of articles and conference abstracts

A set of reference articles [1-32] and conference abstracts [33-38] was used to refine search strategy. Below you can find this list.

1. Berman, I., et al., Obsessions and compulsions as a distinct cluster of symptoms in schizophrenia: a neuropsychological study. *J Nerv Ment Dis*, 1998. 186(3): p. 150-6.
2. Bleich-Cohen, M., et al., Working memory dysfunction in schizophrenia patients with obsessive-compulsive symptoms: an fMRI study. *Eur Psychiatry*, 2014. 29(3): p. 160-6.
3. Borkowska, A., E. Pilaczynska, and J.K. Rybakowski, The frontal lobe neuropsychological tests in patients with schizophrenia and/or obsessive-compulsive disorder. *J Neuropsychiatry Clin Neurosci*, 2003. 15(3): p. 359-62.
4. Bozikas, V.P., et al., The role of obsessive-compulsive symptoms in the perception of insincere speech in first-episode psychosis. *J Clin Exp Neuropsychol*, 2015. 37(8): p. 842-52.
5. Frias, A., et al., Neuropsychological profile and treatment-related features among patients with comorbidity between schizophrenia spectrum disorder and obsessive-compulsive disorder: is there evidence for a "schizo-obsessive" subtype? *Psychiatry Res*, 2014. 220(3): p. 846-54.
6. Hermesh, H., et al., Alternation learning in OCD/schizophrenia patients. *Eur Neuropsychopharmacol*, 2003. 13(2): p. 87-91.
7. Hwang, M.Y., J.E. Morgan, and M.F. Losconzcy, Clinical and neuropsychological profiles of obsessive-compulsive schizophrenia: a pilot study. *J Neuropsychiatry Clin Neurosci*, 2000. 12(1): p. 91-4.
8. Kazhungil, F., et al., Neuropsychological profile of schizophrenia with and without obsessive compulsive disorder. *Asian Journal of Psychiatry*, 2017. 29: p. 30-34.
9. Kim, S.-W., et al., Associations of obsessive-compulsive symptoms with clinical and neurocognitive features in schizophrenia according to stage of illness. *Psychiatry Research*, 2015. 226(1): p. 368-75.
10. Kontis, D., et al., Obsessive compulsive symptoms are associated with better functioning independently of cognition in schizophrenia. *Comprehensive Psychiatry*, 2016. 70: p. 32-40.
11. Kumbhani, S.R., et al., Nonclinical obsessive-compulsive symptoms and executive functions in schizophrenia. *J Neuropsychiatry Clin Neurosci*, 2010. 22(3): p. 304-12.
12. Lee, M.J., et al., Comparative Analysis of Cognitive Function in Schizophrenia with and without Obsessive Compulsive Disorder. *Psychiatry Investig*, 2009. 6(4): p. 286-93.
13. Lysaker, P.H., et al., Association of obsessions and compulsions in schizophrenia with neurocognition and negative symptoms. *J Neuropsychiatry Clin Neurosci*, 2002. 14(4): p. 449-53.
14. Lysaker, P.H., et al., Patterns of obsessive-compulsive symptoms and social function in schizophrenia. *Psychiatry Res*, 2004. 125(2): p. 139-46.
15. Lysaker, P.H., et al., Obsessive and compulsive symptoms in schizophrenia: clinical and neurocognitive correlates. *J Nerv Ment Dis*, 2000. 188(2): p. 78-83.

16. Lysaker, P.H., K.A. Whitney, and L.W. Davis, Associations of executive function with concurrent and prospective reports of obsessive-compulsive symptoms in schizophrenia. *J Neuropsychiatry Clin Neurosci*, 2009. 21(1): p. 38-42.
17. Meijer, J.H., et al., Is a schizo-obsessive subtype associated with cognitive impairment? Results from a large cross-sectional study in patients with psychosis and their unaffected relatives. *J Nerv Ment Dis*, 2013. 201(1): p. 30-5.
18. Michalopoulou, P.G., et al., Can cognitive deficits differentiate between schizophrenia with and without obsessive-compulsive symptoms? *Comprehensive Psychiatry*, 2014. 55(4): p. 1015-1021.
19. Ntouros, E., et al., Emotional perception and theory of mind in first episode psychosis: the role of obsessive-compulsive symptomatology. *Psychiatry Res*, 2014. 220(1-2): p. 112-7.
20. Ongur, D. and D.C. Goff, Obsessive-compulsive symptoms in schizophrenia: associated clinical features, cognitive function and medication status. *Schizophr Res*, 2005. 75(2-3): p. 349-62.
21. Pallanti, S., et al., Cognitive event-related potentials differentiate schizophrenia with obsessive-compulsive disorder (schizo-OCD) from OCD and schizophrenia without OC symptoms. *Psychiatry Res*, 2009. 170(1): p. 52-60.
22. Patel, D.D., et al., The neuropsychology of the schizo-obsessive subtype of schizophrenia: a new analysis. *Psychol Med*, 2010. 40(6): p. 921-33.
23. Sahoo, S., S. Grover, and R. Nehra, Comparison of neurocognitive domains in patients with schizophrenia with and without co-morbid obsessive compulsive disorder. *Schizophrenia Research*, 2018. 201: p. 151-158.
24. Schirmbeck, F., et al., Stable cognitive deficits in schizophrenia patients with comorbid obsessive-compulsive symptoms: a 12-month longitudinal study. *Schizophr Bull*, 2013. 39(6): p. 1261-71.
25. Schirmbeck, F., et al., Longitudinal association between cognitive performance and obsessive-compulsive symptoms in patients with psychosis and unaffected siblings. *Acta Psychiatr Scand*, 2016. 133(5): p. 399-409.
26. Swets, M., et al., Patterns of obsessive-compulsive symptoms and social functioning in schizophrenia; a replication study. *Psychiatry Res*, 2019. 271: p. 421-427.
27. Tiryaki, A. and E. Ozkorumak, Do the obsessive-compulsive symptoms have an effect in schizophrenia? *Compr Psychiatry*, 2010. 51(4): p. 357-62.
28. Tonna, M., et al., The "Obsessive Paradox": The Complex Relationship Between Cognitive and Obsessive Dimensions in Schizophrenia. *J Nerv Ment Dis*, 2019.
29. Tumkaya, S., et al., Schizophrenia with obsessive-compulsive disorder and obsessive-compulsive disorder with poor insight: a neuropsychological comparison. *Psychiatry Res*, 2009. 165(1-2): p. 38-46.
30. Wehbe, J., et al., Prevalence of Obsessive-Compulsive Disorder in Patients With Schizophrenia and Outcome on Positive and Negative Symptoms, Cognition, and Quality of Life. *J Nerv Ment Dis*, 2019. 207(4): p. 239-245.

31. Whitney, K.A., et al., Comparative neuropsychological function in obsessive-compulsive disorder and schizophrenia with and without obsessive-compulsive symptoms. *Schizophr Res*, 2004. 69(1): p. 75-83.
32. Whitton, A.E. and J.D. Henry, The relationship between sub-clinical obsessive-compulsive symptoms and social cognition in chronic schizophrenia. *Br J Clin Psychol*, 2013. 52(2): p. 115-28.
33. Ongur, D., et al., Obsessive-compulsive symptoms among people with schizophrenia: Relation to psychotic symptoms, cognitive performance and antipsychotic medications. *Schizophrenia Research*, 2003. 60(1, Supplement): p. 23.
34. Pallanti, S., Anxiety comorbidities and cognitive evoked potential in patients with schizophrenia *Schizophrenia Research*, 2010. 117(2): p. 210.
35. Theochari, E., et al., Obsessive-compulsive symptoms do not affect visual recognition and working memory in chronic schizophrenia. *Schizophrenia Research*, 2010. 117(2): p. 324-325.
36. Theochari, E., E. Tsaltas, and D. Kontis, Obsessive compulsive symptoms, social functioning and executive functions in chronic schizophrenia. *European Psychiatry*, 2017. 41: p. S386.
37. Tumkaya, S., et al., P.1.f.007 Is there neuropsychological support for schizophrenia and obsessive compulsive spectrum disorders. *European Neuropsychopharmacology*, 2007. 17: p. S300.
38. Bora, L., et al., Prevalence and clinical correlates of comorbid obsessive compulsive disorder in patients with schizophrenia. 2018. 44: p. S362.

## 2. Search terms

Below you can find the exact search terms used for MEDLINE, EMBASE, PsychINFO, and Web of Science.

| <b>Ovid MEDLINE(R) ALL 1946 to May 24, 2019</b><br><b>Search date: 27 May 2019</b> |                                                                                                                                                                                                                                                                                                                                                                                                                                                                                                                                                     |
|------------------------------------------------------------------------------------|-----------------------------------------------------------------------------------------------------------------------------------------------------------------------------------------------------------------------------------------------------------------------------------------------------------------------------------------------------------------------------------------------------------------------------------------------------------------------------------------------------------------------------------------------------|
| <b>#</b>                                                                           | <b>Searches</b>                                                                                                                                                                                                                                                                                                                                                                                                                                                                                                                                     |
| 1                                                                                  | "Affective Disorders, Psychotic"/ or "Psychotic Disorders"/ or "Schizophrenia"/ or "Schizophrenia, Catatonic"/ or "Schizophrenia, Disorganized"/ or "Schizophrenia, Paranoid"/                                                                                                                                                                                                                                                                                                                                                                      |
| 2                                                                                  | (schizophren* or affective psychosis or depressive psychosis or psychotic affective or schizoaffect* or first episode psychosis or schizo-obsessive or schizoobses* or hebephrenia).ab,kf,ti.                                                                                                                                                                                                                                                                                                                                                       |
| 3                                                                                  | Brief Psychiatric Rating Scale/                                                                                                                                                                                                                                                                                                                                                                                                                                                                                                                     |
| 4                                                                                  | (brief psychiatric rating scale or "Scale for the Assessment of Positive Symptoms" or "Scale for the Assessment of Negative Symptoms" or "Positive and Negative Syndrome Scale").ab,kf,ti.                                                                                                                                                                                                                                                                                                                                                          |
| 5                                                                                  | ((BPRS or SAPS or SANS or PANSS) adj2 (scale? or inventor* or scor* or rating or assessment)).ab,kf,ti.                                                                                                                                                                                                                                                                                                                                                                                                                                             |
| 6                                                                                  | or/1-5                                                                                                                                                                                                                                                                                                                                                                                                                                                                                                                                              |
| 7                                                                                  | Obsessive-Compulsive Disorder/                                                                                                                                                                                                                                                                                                                                                                                                                                                                                                                      |
| 8                                                                                  | ((ocs or ocd) and obses*) or obsessive compulsive).ab,kf,ti.                                                                                                                                                                                                                                                                                                                                                                                                                                                                                        |
| 9                                                                                  | (yale brown or (maudsley adj3 (inventory or scale))).ab,kf,ti.                                                                                                                                                                                                                                                                                                                                                                                                                                                                                      |
| 10                                                                                 | ("y bocs" or ybocs or oci or moci) adj2 (scale? or inventor* or scor* or rating or assessment)).ab,kf,ti.                                                                                                                                                                                                                                                                                                                                                                                                                                           |
| 11                                                                                 | or/7-10                                                                                                                                                                                                                                                                                                                                                                                                                                                                                                                                             |
| 12                                                                                 | cognitive dysfunction/ or frontal lobe/ or cognition disorders/ or attention/ or executive function/ or psychomotor performance/ or reaction time/ or semantics/ or color perception/ or "discrimination (psychology)"/ or facial expression/ or "inhibition (psychology)"/ or learning/ or verbal learning/ or reversal learning/ or serial learning/ or memory/ or "pattern recognition, visual"/ or problem solving/ or "recognition (psychology)"/ or "retention (psychology)"/ or social perception/ or visual perception/ or wechsler scales/ |
| 13                                                                                 | (cogniti* or neurocogniti* or frontal lobe or cognition disorders or attention or executive function or psychomotor performance or reaction time or semantics or color perception or facial expression or inhibition or learning or verbal learning or reversal learning or serial learning or memory or pattern recognition or problem solving or recognition or retention or social perception or visual perception or wechsler scale? or (executive adj3 function*)).ab,kf,ti.                                                                   |

|    |                                                                                                                                                                                                                                                                                                                                                                                                                                                                                                                                                                                                                                                                                                                                                                                                                                                                                                                                                                                                                                                                                                                                                                                                                                                                                                                                                                                                                                                                                                                                                                                                                                                                                                                                                                                                                                                                                                                                                                                                                                                                                                                                                                                                                                                                                                                                                                                                                                                                                                                   |
|----|-------------------------------------------------------------------------------------------------------------------------------------------------------------------------------------------------------------------------------------------------------------------------------------------------------------------------------------------------------------------------------------------------------------------------------------------------------------------------------------------------------------------------------------------------------------------------------------------------------------------------------------------------------------------------------------------------------------------------------------------------------------------------------------------------------------------------------------------------------------------------------------------------------------------------------------------------------------------------------------------------------------------------------------------------------------------------------------------------------------------------------------------------------------------------------------------------------------------------------------------------------------------------------------------------------------------------------------------------------------------------------------------------------------------------------------------------------------------------------------------------------------------------------------------------------------------------------------------------------------------------------------------------------------------------------------------------------------------------------------------------------------------------------------------------------------------------------------------------------------------------------------------------------------------------------------------------------------------------------------------------------------------------------------------------------------------------------------------------------------------------------------------------------------------------------------------------------------------------------------------------------------------------------------------------------------------------------------------------------------------------------------------------------------------------------------------------------------------------------------------------------------------|
| 14 | (Wisconsin Card Sorting test or WCST or Milwaukee Card Sorting Test or Modified Card Sorting Test or Trail Making Test or TMT or Partington Pathways or Color Trials Test or Stroop test or Stroop task or Color-Word Interference Test or Controlled Oral Word Association Test or COWA or COWAT or Verbal Fluency or Word Fluency or Letter Fluency or FAS or Category Fluency or Phonemic Fluency or Semantic Fluency or Controlled Verbal Fluency or Thurstone Word Fluency Test or Rey-Osterrieth Complex Figure Test or RCFT or ROFT or CFT or Complex Figure Test or Rey Figure or Wechsler Adult Intelligence Scale or WAIS or Wechsler Abbreviated Scale or WASI or Vocabulary or Arithmetic or Digit Span or Letter-Number Sequencing or Picture Completion or Block Design or Matrix Reasoning or Digit Symbol or Symbol Search or Picture Arrangement or Object Assembly or Response shifting Task or RST or Set shifting or Continuous Performance Test or CPT or Cambridge Neuropsychological Test Automated Batteries or CANTAB or Motor Screening or Matching to Sample or Pattern Recognition Memory or Spatial Recognition Memory or Paired Associate Learning or Spatial Span or Spatial Working Memory or Big Little Circle or "Intra/Extradimensional shift" or IED or Rapid Visual Information Processing or Reaction Time or Stockings of Cambridge or National Adult Reading Test or NART or Adult Reading Test or ART or NAART or gambling task or IGT or CVLT or Verbal Learning test or Mini Mental State Examination or MMSE or 3MS or Rey Auditory Verbal Learning Test or RAVLT or AVLT or Finger tapping test or FTT or Finger Oscillation Test or Ruff Figural Fluency Test or RFFT or Benton Visual Retention test or BVRT or Visual retention test or VRT or Benton-test or "Raven's Progressive Matrices" or RPM or Standard Progressive Matrices or SPM or Colored Progressive Matrices or CPM or Alternation learning test or Wechsler Memory Scale or WMS or Hinting Task or Theory of Mind or Wide Range Achievement Test or WRAT or Hopkins Verbal Learning Test or HVLT or Auditory Consonant Trigrams Test or ACTT or Brown-Peterson task or Delis-Kaplan Executive Function System or D-KEFS or DKEFS or Test for Attentional Performance or "Go/NoGo" or Nback or "d2" or Mind in Eyes or "Facial Expression and Emotion Stimuli and Tests" or FEEST or "Ekman 60 faces" or emotion hexagon test or MATRICS or MCCB or Matrics Consensus Cognitive Battery).ab,kf,ti. |
| 15 | or/12-14                                                                                                                                                                                                                                                                                                                                                                                                                                                                                                                                                                                                                                                                                                                                                                                                                                                                                                                                                                                                                                                                                                                                                                                                                                                                                                                                                                                                                                                                                                                                                                                                                                                                                                                                                                                                                                                                                                                                                                                                                                                                                                                                                                                                                                                                                                                                                                                                                                                                                                          |
| 16 | and/6,11,15                                                                                                                                                                                                                                                                                                                                                                                                                                                                                                                                                                                                                                                                                                                                                                                                                                                                                                                                                                                                                                                                                                                                                                                                                                                                                                                                                                                                                                                                                                                                                                                                                                                                                                                                                                                                                                                                                                                                                                                                                                                                                                                                                                                                                                                                                                                                                                                                                                                                                                       |

|          |                                                                                                                                                                                               |
|----------|-----------------------------------------------------------------------------------------------------------------------------------------------------------------------------------------------|
|          | <b>Ovid Embase Classic+Embase &lt;1947 to 2019 May 24&gt;<br/>Search date: 27 May 2019</b>                                                                                                    |
| <b>#</b> | <b>Searches</b>                                                                                                                                                                               |
| 1        | exp *schizophrenia/ or affective psychosis/ or depressive psychosis/                                                                                                                          |
| 2        | (schizophren* or affective psychosis or depressive psychosis or psychotic affective or schizoaffect* or first episode psychosis or schizo-obsessive or schizoobses* or hebephrenia).ab,kw,ti. |
| 3        | Brief Psychiatric Rating Scale/ or "positive and negative syndrome scale"/                                                                                                                    |
| 4        | (brief psychiatric rating scale or "Scale for the Assessment of Positive Symptoms" or "Scale for the Assessment of Negative Symptoms" or "Positive and Negative Syndrome Scale").ab,kw,ti.    |
| 5        | ((BPRS or SAPS or SANS or PANSS) adj2 (scale? or inventor* or scor* or rating or assessment)).ab,kw,ti.                                                                                       |

|    |                                                                                                                                                                                                                                                                                                                                                                                                                                                                                                                                                                                                                                                                                                                                                                                                                                                                                                                                                                                                                                                                                                                                                                                                                                                                                                                                                                                                                                                                                                                                                                                                                                                                                                                                                                                                                                                                                                                                                                                                                                                                                                                                                                                                                                                                                                                                                                                                                                                                                                                     |
|----|---------------------------------------------------------------------------------------------------------------------------------------------------------------------------------------------------------------------------------------------------------------------------------------------------------------------------------------------------------------------------------------------------------------------------------------------------------------------------------------------------------------------------------------------------------------------------------------------------------------------------------------------------------------------------------------------------------------------------------------------------------------------------------------------------------------------------------------------------------------------------------------------------------------------------------------------------------------------------------------------------------------------------------------------------------------------------------------------------------------------------------------------------------------------------------------------------------------------------------------------------------------------------------------------------------------------------------------------------------------------------------------------------------------------------------------------------------------------------------------------------------------------------------------------------------------------------------------------------------------------------------------------------------------------------------------------------------------------------------------------------------------------------------------------------------------------------------------------------------------------------------------------------------------------------------------------------------------------------------------------------------------------------------------------------------------------------------------------------------------------------------------------------------------------------------------------------------------------------------------------------------------------------------------------------------------------------------------------------------------------------------------------------------------------------------------------------------------------------------------------------------------------|
| 6  | or/1-5                                                                                                                                                                                                                                                                                                                                                                                                                                                                                                                                                                                                                                                                                                                                                                                                                                                                                                                                                                                                                                                                                                                                                                                                                                                                                                                                                                                                                                                                                                                                                                                                                                                                                                                                                                                                                                                                                                                                                                                                                                                                                                                                                                                                                                                                                                                                                                                                                                                                                                              |
| 7  | exp *Obsessive Compulsive Disorder/                                                                                                                                                                                                                                                                                                                                                                                                                                                                                                                                                                                                                                                                                                                                                                                                                                                                                                                                                                                                                                                                                                                                                                                                                                                                                                                                                                                                                                                                                                                                                                                                                                                                                                                                                                                                                                                                                                                                                                                                                                                                                                                                                                                                                                                                                                                                                                                                                                                                                 |
| 8  | ((((ocs or ocd) and obses*) or obsessive compulsive).ab,kw,ti.                                                                                                                                                                                                                                                                                                                                                                                                                                                                                                                                                                                                                                                                                                                                                                                                                                                                                                                                                                                                                                                                                                                                                                                                                                                                                                                                                                                                                                                                                                                                                                                                                                                                                                                                                                                                                                                                                                                                                                                                                                                                                                                                                                                                                                                                                                                                                                                                                                                      |
| 9  | Yale Brown Obsessive Compulsive Scale/                                                                                                                                                                                                                                                                                                                                                                                                                                                                                                                                                                                                                                                                                                                                                                                                                                                                                                                                                                                                                                                                                                                                                                                                                                                                                                                                                                                                                                                                                                                                                                                                                                                                                                                                                                                                                                                                                                                                                                                                                                                                                                                                                                                                                                                                                                                                                                                                                                                                              |
| 10 | (yale brown or (maudsley adj3 (inventory or scale))).ab,kw,ti.                                                                                                                                                                                                                                                                                                                                                                                                                                                                                                                                                                                                                                                                                                                                                                                                                                                                                                                                                                                                                                                                                                                                                                                                                                                                                                                                                                                                                                                                                                                                                                                                                                                                                                                                                                                                                                                                                                                                                                                                                                                                                                                                                                                                                                                                                                                                                                                                                                                      |
| 11 | ((("y boc" or yboc or oci or moci) adj2 (scale? or inventor* or scor* or rating or assessment))).ab,kw,ti.                                                                                                                                                                                                                                                                                                                                                                                                                                                                                                                                                                                                                                                                                                                                                                                                                                                                                                                                                                                                                                                                                                                                                                                                                                                                                                                                                                                                                                                                                                                                                                                                                                                                                                                                                                                                                                                                                                                                                                                                                                                                                                                                                                                                                                                                                                                                                                                                          |
| 12 | or/7-11                                                                                                                                                                                                                                                                                                                                                                                                                                                                                                                                                                                                                                                                                                                                                                                                                                                                                                                                                                                                                                                                                                                                                                                                                                                                                                                                                                                                                                                                                                                                                                                                                                                                                                                                                                                                                                                                                                                                                                                                                                                                                                                                                                                                                                                                                                                                                                                                                                                                                                             |
| 13 | cognitive defect/ or frontal lobe/ or attention/ or executive function/ or psychomotor performance/ or reaction time/ or semantics/ or color vision/ or facial expression/ or learning/ or verbal learning/ or reversal learning/ or sequence learning/ or memory/ or pattern recognition/ or problem solving/ or recognition/ or retention/ or perception/ or wechsler intelligence scale/ or wechsler adult intelligence scale/                                                                                                                                                                                                                                                                                                                                                                                                                                                                                                                                                                                                                                                                                                                                                                                                                                                                                                                                                                                                                                                                                                                                                                                                                                                                                                                                                                                                                                                                                                                                                                                                                                                                                                                                                                                                                                                                                                                                                                                                                                                                                   |
| 14 | (cogniti* or neurocogniti* or frontal lobe or cognition disorders or attention or executive function or psychomotor performance or reaction time or semantics or color perception or facial expression or inhibition or learning or verbal learning or reversal learning or serial learning or memory or pattern recognition or problem solving or recognition or retention or social perception or visual perception or wechsler scale? or (executive adj3 function*)).ab,kw,ti.                                                                                                                                                                                                                                                                                                                                                                                                                                                                                                                                                                                                                                                                                                                                                                                                                                                                                                                                                                                                                                                                                                                                                                                                                                                                                                                                                                                                                                                                                                                                                                                                                                                                                                                                                                                                                                                                                                                                                                                                                                   |
| 15 | (Wisconsin Card Sorting test or WCST or Milwaukee Card Sorting Test or Modified Card Sorting Test or Trail Making Test or TMT or Partington Pathways or Color Trials Test or Stroop test or Stroop task or Color-Word Interference Test or Controlled Oral Word Association Test or COWA or COWAT or Verbal Fluency or Word Fluency or Letter Fluency or FAS or Category Fluency or Phonemic Fluency or Semantic Fluency or Controlled Verbal Fluency or Thurstone Word Fluency Test or Rey-Osterrieth Complex Figure Test or RCFT or ROFT or CFT or Complex Figure Test or Rey Figure or Wechsler Adult Intelligence Scale or WAIS or Wechsler Abbreviated Scale or WASI or Vocabulary or Arithmetic or Digit Span or Letter-Number Sequencing or Picture Completion or Block Design or Matrix Reasoning or Digit Symbol or Symbol Search or Picture Arrangement or Object Assembly or Response shifting Task or RST or Set shifting or Continuous Performance Test or CPT or Cambridge Neuropsychological Test Automated Batteries or CANTAB or Motor Screening or Matching to Sample or Pattern Recognition Memory or Spatial Recognition Memory or Paired Associate Learning or Spatial Span or Spatial Working Memory or Big Little Circle or "Intra/Extradimensional shift" or IED or Rapid Visual Information Processing or Reaction Time or Stockings of Cambridge or National Adult Reading Test or NART or Adult Reading Test or ART or NAART or gambling task or IGT or CVLT or Verbal Learning test or Mini Mental State Examination or MMSE or 3MS or Rey Auditory Verbal Learning Test or RAVLT or AVLTL or Finger tapping test or FTT or Finger Oscillation Test or Ruff Figural Fluency Test or RFFT or Benton Visual Retention test or BVRT or Visual retention test or VRT or Benton-test or "Raven's Progressive Matrices" or RPM or Standard Progressive Matrices or SPM or Colored Progressive Matrices or CPM or Alternation learning test or Wechsler Memory Scale or WMS or Hinting Task or Theory of Mind or Wide Range Achievement Test or WRAT or Hopkins Verbal Learning Test or HVLTL or Auditory Consonant Trigrams Test or ACTT or Brown-Peterson task or Delis-Kaplan Executive Function System or D-KEFS or DKEFS or Test for Attentional Performance or "Go/NoGo" or Nback or "d2" or Mind in Eyes or "Facial Expression and Emotion Stimuli and Tests" or FEEST or "Ekman 60 faces" or emotion hexagon test or MATRICS or MCCB or Matrics Consensus Cognitive Battery).ab,kw,ti. |

|    |             |
|----|-------------|
| 16 | or/13-15    |
| 17 | and/6,12,16 |

| <b>Ovid PsycINFO &lt;1806 to May Week 3 2019&gt;</b> |                                                                                                                                                                                                                                                                                                                                                                                                                                                                                            |
|------------------------------------------------------|--------------------------------------------------------------------------------------------------------------------------------------------------------------------------------------------------------------------------------------------------------------------------------------------------------------------------------------------------------------------------------------------------------------------------------------------------------------------------------------------|
| <b>Search date: 27 May 2019</b>                      |                                                                                                                                                                                                                                                                                                                                                                                                                                                                                            |
| <b>#</b>                                             | <b>Searches</b>                                                                                                                                                                                                                                                                                                                                                                                                                                                                            |
| 1                                                    | exp schizophrenia/ or schizoaffective disorder/ or affective psychosis/ or "positive and negative symptoms"/                                                                                                                                                                                                                                                                                                                                                                               |
| 2                                                    | (schizophren* or affective psychosis or depressive psychosis or psychotic affective or schizoaffect* or first episode psychosis or schizo-<br>obsessive or schizoobses* or hebephrenia).ab,id,ti.                                                                                                                                                                                                                                                                                          |
| 3                                                    | (brief psychiatric rating scale or "Scale for the Assessment of Positive Symptoms" or "Scale for the Assessment of Negative Symptoms" or<br>"Positive and Negative Syndrome Scale").ab,id,ti,tm.                                                                                                                                                                                                                                                                                           |
| 4                                                    | ((BPRS or SAPS or SANS or PANSS) adj2 (scale? or inventor* or scor* or rating or assessment)).ab,id,ti,tm.                                                                                                                                                                                                                                                                                                                                                                                 |
| 5                                                    | or/1-4                                                                                                                                                                                                                                                                                                                                                                                                                                                                                     |
| 6                                                    | exp Obsessive Compulsive Disorder/                                                                                                                                                                                                                                                                                                                                                                                                                                                         |
| 7                                                    | ((((ocs or ocd) and obses*) or obsessive compulsive).ab,id,ti.                                                                                                                                                                                                                                                                                                                                                                                                                             |
| 8                                                    | (yale brown or (maudsley adj3 (inventory or scale))).ab,id,ti,tm.                                                                                                                                                                                                                                                                                                                                                                                                                          |
| 9                                                    | (("y boc" or yboc" or oci or moci) adj2 (scale? or inventor* or scor* or rating or assessment)).ab,id,ti,tm.                                                                                                                                                                                                                                                                                                                                                                               |
| 10                                                   | or/6-9                                                                                                                                                                                                                                                                                                                                                                                                                                                                                     |
| 11                                                   | cognitive impairment/ or frontal lobe/ or attention/ or executive function/ or reaction time/ or semantics/ or color perception/ or facial<br>expressions/ or learning/ or verbal learning/ or sequential learning/ or memory/ or "pattern recognition (Cognitive Process)"/ or problem<br>solving/ or "recognition (LEARNING)"/ or retention/ or perception/                                                                                                                              |
| 12                                                   | (cogniti* or neurocogniti* or frontal lobe or cognition disorders or attention or executive function or psychomotor performance or reaction<br>time or semantics or color perception or facial expression or inhibition or learning or verbal learning or reversal learning or serial learning or<br>memory or pattern recognition or problem solving or recognition or retention or social perception or visual perception or wechsler scale? or<br>(executive adj3 function*)).ab,id,ti. |



|    |                                                                                                                                                                                                                                                                                                                                                                                                                                                                                                                                                                                                                                                                                                                                                                                                                                                                                                                                                                                                                                                                                                                                                                                                                                                                                                                                                                                                                                                                                                                                                                                                                                                                                                                                                                                                                                                                                                                                                                                                                                                                                                                                                                                                                                                                                                                                                                                                                                                                                                                         |
|----|-------------------------------------------------------------------------------------------------------------------------------------------------------------------------------------------------------------------------------------------------------------------------------------------------------------------------------------------------------------------------------------------------------------------------------------------------------------------------------------------------------------------------------------------------------------------------------------------------------------------------------------------------------------------------------------------------------------------------------------------------------------------------------------------------------------------------------------------------------------------------------------------------------------------------------------------------------------------------------------------------------------------------------------------------------------------------------------------------------------------------------------------------------------------------------------------------------------------------------------------------------------------------------------------------------------------------------------------------------------------------------------------------------------------------------------------------------------------------------------------------------------------------------------------------------------------------------------------------------------------------------------------------------------------------------------------------------------------------------------------------------------------------------------------------------------------------------------------------------------------------------------------------------------------------------------------------------------------------------------------------------------------------------------------------------------------------------------------------------------------------------------------------------------------------------------------------------------------------------------------------------------------------------------------------------------------------------------------------------------------------------------------------------------------------------------------------------------------------------------------------------------------------|
| 13 | (Wisconsin Card Sorting test or WCST or Milwaukee Card Sorting Test or Modified Card Sorting Test or Trail Making Test or TMT or Partington Pathways or Color Trials Test or Stroop test or Stroop task or Color-Word Interference Test or Controlled Oral Word Association Test or COWA or COWAT or Verbal Fluency or Word Fluency or Letter Fluency or FAS or Category Fluency or Phonemic Fluency or Semantic Fluency or Controlled Verbal Fluency or Thurstone Word Fluency Test or Rey-Osterrieth Complex Figure Test or RCFT or ROFT or CFT or Complex Figure Test or Rey Figure or Wechsler Adult Intelligence Scale or WAIS or Wechsler Abbreviated Scale or WASI or Vocabulary or Arithmetic or Digit Span or Letter-Number Sequencing or Picture Completion or Block Design or Matrix Reasoning or Digit Symbol or Symbol Search or Picture Arrangement or Object Assembly or Response shifting Task or RST or Set shifting or Continuous Performance Test or CPT or Cambridge Neuropsychological Test Automated Batteries or CANTAB or Motor Screening or Matching to Sample or Pattern Recognition Memory or Spatial Recognition Memory or Paired Associate Learning or Spatial Span or Spatial Working Memory or Big Little Circle or "Intra/Extradimensional shift" or IED or Rapid Visual Information Processing or Reaction Time or Stockings of Cambridge or National Adult Reading Test or NART or Adult Reading Test or ART or NAART or gambling task or IGT or CVLT or Verbal Learning test or Mini Mental State Examination or MMSE or 3MS or Rey Auditory Verbal Learning Test or RAVLT or AVLT or Finger tapping test or FTT or Finger Oscillation Test or Ruff Figural Fluency Test or RFFT or Benton Visual Retention test or BVRT or Visual retention test or VRT or Benton-test or "Raven's Progressive Matrices" or RPM or Standard Progressive Matrices or SPM or Colored Progressive Matrices or CPM or Alternation learning test or Wechsler Memory Scale or WMS or Hinting Task or Theory of Mind or Wide Range Achievement Test or WRAT or Hopkins Verbal Learning Test or HVLT or Auditory Consonant Trigrams Test or ACTT or Brown-Peterson task or Delis-Kaplan Executive Function System or D-KEFS or DKEFS or Test for Attentional Performance or "Go/NoGo" or Nback or "d2" or Mind in Eyes or "Facial Expression and Emotion Stimuli and Tests" or FEEST or "Ekman 60 faces" or emotion hexagon test or MATRICS or MCCB or Matrics Consensus Cognitive Battery).ab,hw,id,ti,tm. |
| 14 | or/11-13                                                                                                                                                                                                                                                                                                                                                                                                                                                                                                                                                                                                                                                                                                                                                                                                                                                                                                                                                                                                                                                                                                                                                                                                                                                                                                                                                                                                                                                                                                                                                                                                                                                                                                                                                                                                                                                                                                                                                                                                                                                                                                                                                                                                                                                                                                                                                                                                                                                                                                                |
| 15 | and/5,10,14                                                                                                                                                                                                                                                                                                                                                                                                                                                                                                                                                                                                                                                                                                                                                                                                                                                                                                                                                                                                                                                                                                                                                                                                                                                                                                                                                                                                                                                                                                                                                                                                                                                                                                                                                                                                                                                                                                                                                                                                                                                                                                                                                                                                                                                                                                                                                                                                                                                                                                             |

| <b>Web of Science Core Collection</b> |                                                                                                                                                                                                                                      |
|---------------------------------------|--------------------------------------------------------------------------------------------------------------------------------------------------------------------------------------------------------------------------------------|
| <b>Search date: 27 May 2019</b>       |                                                                                                                                                                                                                                      |
| <b>#</b>                              | <b>Searches</b>                                                                                                                                                                                                                      |
| 1                                     | TS=("positive and negative symptoms" OR schizophren* or "affective psychosis" or "depressive psychosis" or "psychotic affective" or schizoaffect* or "first episode psychosis" or "schizo-obsessive" or schizoobses* or hebephrenia) |
| 2                                     | TS=("brief psychiatric rating scale" or "Scale for the Assessment of Positive Symptoms" or "Scale for the Assessment of Negative Symptoms" or "Positive and Negative Syndrome Scale")                                                |
| 3                                     | TS=((BPRS or SAPS or SANS or PANSS) NEAR/1 (scale? or inventor* or scor* or rating or assessment))                                                                                                                                   |
| 4                                     | #1 OR #2 OR #3                                                                                                                                                                                                                       |
| 5                                     | TS=("obsessive compulsive")                                                                                                                                                                                                          |

|    |                                                                                                                                                                                                                                                                                                                                                                                                                                                                                                                                                                                                                                                                                                                                                                                                                                                                                                                                                                                                                                                                                                                                                                                                                                                                                                                                                                                                                                                                                                                                                                                                                                                                                                                                                                                                                                                                                                                                                                                                                                                                                                                                                                                                                                                                                                                                                                                                                                                                                                             |
|----|-------------------------------------------------------------------------------------------------------------------------------------------------------------------------------------------------------------------------------------------------------------------------------------------------------------------------------------------------------------------------------------------------------------------------------------------------------------------------------------------------------------------------------------------------------------------------------------------------------------------------------------------------------------------------------------------------------------------------------------------------------------------------------------------------------------------------------------------------------------------------------------------------------------------------------------------------------------------------------------------------------------------------------------------------------------------------------------------------------------------------------------------------------------------------------------------------------------------------------------------------------------------------------------------------------------------------------------------------------------------------------------------------------------------------------------------------------------------------------------------------------------------------------------------------------------------------------------------------------------------------------------------------------------------------------------------------------------------------------------------------------------------------------------------------------------------------------------------------------------------------------------------------------------------------------------------------------------------------------------------------------------------------------------------------------------------------------------------------------------------------------------------------------------------------------------------------------------------------------------------------------------------------------------------------------------------------------------------------------------------------------------------------------------------------------------------------------------------------------------------------------------|
| 6  | TS=("yale brown" or (maudsley NEAR/2 (inventory or scale)))                                                                                                                                                                                                                                                                                                                                                                                                                                                                                                                                                                                                                                                                                                                                                                                                                                                                                                                                                                                                                                                                                                                                                                                                                                                                                                                                                                                                                                                                                                                                                                                                                                                                                                                                                                                                                                                                                                                                                                                                                                                                                                                                                                                                                                                                                                                                                                                                                                                 |
| 7  | TS(("y bocs" or ybocs or oci or moci) NEAR/1 (scale? or inventor* or scor* or rating or assessment))                                                                                                                                                                                                                                                                                                                                                                                                                                                                                                                                                                                                                                                                                                                                                                                                                                                                                                                                                                                                                                                                                                                                                                                                                                                                                                                                                                                                                                                                                                                                                                                                                                                                                                                                                                                                                                                                                                                                                                                                                                                                                                                                                                                                                                                                                                                                                                                                        |
| 8  | #5 OR #6 OR #7                                                                                                                                                                                                                                                                                                                                                                                                                                                                                                                                                                                                                                                                                                                                                                                                                                                                                                                                                                                                                                                                                                                                                                                                                                                                                                                                                                                                                                                                                                                                                                                                                                                                                                                                                                                                                                                                                                                                                                                                                                                                                                                                                                                                                                                                                                                                                                                                                                                                                              |
| 9  | TS=(cogniti* or neurocogniti* or frontal lobe or cognition disorders or attention or executive function or psychomotor performance or reaction time or semantics or color perception or facial expression or inhibition or learning or verbal learning or reversal learning or serial learning or memory or pattern recognition or problem solving or recognition or retention or social perception or visual perception or wechsler scale? or (executive NEAR/2 function*))                                                                                                                                                                                                                                                                                                                                                                                                                                                                                                                                                                                                                                                                                                                                                                                                                                                                                                                                                                                                                                                                                                                                                                                                                                                                                                                                                                                                                                                                                                                                                                                                                                                                                                                                                                                                                                                                                                                                                                                                                                |
| 10 | TS=(Wisconsin Card Sorting test or WCST or Milwaukee Card Sorting Test or Modified Card Sorting Test or Trail Making Test or TMT or Partington Pathways or Color Trials Test or Stroop test or Stroop task or Color-Word Interference Test or Controlled Oral Word Association Test or COWA or COWAT or Verbal Fluency or Word Fluency or Letter Fluency or FAS or Category Fluency or Phonemic Fluency or Semantic Fluency or Controlled Verbal Fluency or Thurstone Word Fluency Test or Rey-Osterrieth Complex Figure Test or RCFT or ROFT or CFT or Complex Figure Test or Rey Figure or Wechsler Adult Intelligence Scale or WAIS or Wechsler Abbreviated Scale or WASI or Vocabulary or Arithmetic or Digit Span or Letter-Number Sequencing or Picture Completion or Block Design or Matrix Reasoning or Digit Symbol or Symbol Search or Picture Arrangement or Object Assembly or Response shifting Task or RST or Set shifting or Continuous Performance Test or CPT or Cambridge Neuropsychological Test Automated Batteries or CANTAB or Motor Screening or Matching to Sample or Pattern Recognition Memory or Spatial Recognition Memory or Paired Associate Learning or Spatial Span or Spatial Working Memory or Big Little Circle or "Intra/Extradimensional shift" or IED or Rapid Visual Information Processing or Reaction Time or Stockings of Cambridge or National Adult Reading Test or NART or Adult Reading Test or ART or NAART or gambling task or IGT or CVLT or Verbal Learning test or Mini Mental State Examination or MMSE or 3MS or Rey Auditory Verbal Learning Test or RAVLT or AVLT or Finger tapping test or FTT or Finger Oscillation Test or Ruff Figural Fluency Test or RFFT or Benton Visual Retention test or BVRT or Visual retention test or VRT or Benton-test or "Raven's Progressive Matrices" or RPM or Standard Progressive Matrices or SPM or Colored Progressive Matrices or CPM or Alternation learning test or Wechsler Memory Scale or WMS or Hinting Task or Theory of Mind or Wide Range Achievement Test or WRAT or Hopkins Verbal Learning Test or HVLTL or Auditory Consonant Trigrams Test or ACTT or Brown-Peterson task or Delis-Kaplan Executive Function System or D-KEFS or DKEFS or Test for Attentional Performance or "Go/NoGo" or Nback or "d2" or Mind in Eyes or "Facial Expression and Emotion Stimuli and Tests" or FEEST or "Ekman 60 faces" or emotion hexagon test or MATRICS or MCCB or Matrics Consensus Cognitive Battery) |
| 11 | #9 OR #10                                                                                                                                                                                                                                                                                                                                                                                                                                                                                                                                                                                                                                                                                                                                                                                                                                                                                                                                                                                                                                                                                                                                                                                                                                                                                                                                                                                                                                                                                                                                                                                                                                                                                                                                                                                                                                                                                                                                                                                                                                                                                                                                                                                                                                                                                                                                                                                                                                                                                                   |
| 12 | #4 AND #8 AND #11                                                                                                                                                                                                                                                                                                                                                                                                                                                                                                                                                                                                                                                                                                                                                                                                                                                                                                                                                                                                                                                                                                                                                                                                                                                                                                                                                                                                                                                                                                                                                                                                                                                                                                                                                                                                                                                                                                                                                                                                                                                                                                                                                                                                                                                                                                                                                                                                                                                                                           |

### 3. Data extraction form

This is the list of items in the data-extraction form. The original data extraction form was an excel sheet, but it is represented as a list for the purpose of readability.

#### ***Per study data***

1. Author
2. Year of publication
3. Title of publication
4. DOI number
5. Study type  
(e.g. prospective, cross-sectional, RCT)
6. Country of study
7. Setting  
(e.g. in- or outpatient)
8. Number of study participants
9. Mean age
10. % Male
11. Ethnicity  
% of ethnic groups
12. First episode sample?
13. Instrument used to assess OCS
14. How OCS/OCD was defined
15. Type of psychosis  
(e.g. non-affective, first episode, schizophrenia only)
16. Instrument used to assess psychotic illness
17. PANSS total score
18. PANSS positive score
19. PANSS negative score
20. PANSS GPP score
21. Antipsychotic medication
22. Substance abuse as exclusion criterion?
23. Instruments used to assess other comorbidities  
(e.g. HDRS)
24. Cognitive tests reported
25. Corrected for confounders?
26. Cognitive domain according to authors
27. Authors own conclusions

#### ***Cognitive test outcomes***

28. N per subgroup
29. Mean + SD for test outcomes
30. Effect sizes
31. Correlation coefficient
32. P-value

#### ***Confounders per OCS+ or OCS- subgroup***

33. Age (Mean+ SD)
34. % Male
35. Duration of psychotic illness (Mean+ SD)
36. Age of onset (Mean+ SD)
37. PANSS total (Mean+ SD)
38. PANSS positive (Mean+ SD)
39. PANSS negative (Mean+ SD)
40. PANSS GPP (Mean+ SD)
41. Antipsychotic medication  
% per drug
42. Clozapine use %
43. 2nd generation antipsychotic use %
44. Antidepressant use %
45. Other comorbidity  
% of other comorbidities if reported
46. YBOCS score  
(Mean+ SD)
47. Education in years (Mean+ SD)

#### 4. Result aggregation

When classifying tests and their respective test measures into cognitive domains, we aimed to create categories that were as homogenous as possible, while simultaneously avoiding making too many categories with a small number of studies barring the possibility to conduct a meta-analysis. We determined a minimum of four studies within a category were required to perform meta-analysis.

Each of the following tables shows which cognitive tests and corresponding measures within that test were combined into a domain. The final table shows an overview of measures that were reported in insufficient studies to be combined into a meta-analysis. Note that the order of presentation in each table is also the order of preference in the analysis. E.g. if a study reported both TMT A and digit symbol coding, TMT A was used for the analysis.

| Visual spatial abilities | Test measure |
|--------------------------|--------------|
| block design             | -            |

| Social cognition:                | Test measure             |
|----------------------------------|--------------------------|
| <b>Facial affect recognition</b> |                          |
| DFAR                             | -                        |
| Ekman 60 faces                   | -                        |
| PESIT                            | Facial affect perception |
| Cantab emotion recognition       | -                        |
| Emotion recognition              | -                        |

| Attention                             | Test measure           |
|---------------------------------------|------------------------|
| <b>Processing speed not RT based:</b> |                        |
| TMT A                                 | seconds                |
| Digit Symbol Coding                   | -                      |
| MATRICES                              | -                      |
| DKEFS number sequencing               | -                      |
| <b>Processing speed RT based:</b>     |                        |
| CPT                                   | RT                     |
| Nback                                 | RT                     |
| Cantab RTI                            | 5 choice RT            |
| Stroop word reading                   | seconds                |
| <b>Sustained attention:</b>           |                        |
| CPT                                   | Accuracy/omission/hits |
| Cantab RVP                            | A                      |

| Memory                         | Test measure                                  |
|--------------------------------|-----------------------------------------------|
| <b>Immediate visual memory</b> |                                               |
| RCFT                           | Recall trial/ immediate                       |
| MATRICES (BVMT-R)              | Total recall over 3 trials                    |
| WMS visual memory              | immediate                                     |
| VRT                            | -                                             |
| 'immediate visual memory'      | -                                             |
| Cantab PAL                     | Total errors adjusted                         |
| Cantab PRM                     | % correct                                     |
| <b>Delayed visual memory</b>   |                                               |
| RCFT                           | delayed                                       |
| 'delayed visual memory'        | -                                             |
| WMS visual memory              | Delayed recall                                |
| <b>Working memory:</b>         |                                               |
| digit span                     | (forward)                                     |
| arithmetic                     | -                                             |
| Letter Number Sequencing       | -                                             |
| Nback                          | Accuracy/mistakes                             |
| SWM                            | errors                                        |
| MATRICES                       | -                                             |
| <b>Trial 1 verbal memory*</b>  |                                               |
| RAVLT                          | A1/trial 1/immediate recall/short term memory |
| Cantab VRM                     | Total correct phase 1                         |

| Memory continued                             | Test measure     |
|----------------------------------------------|------------------|
| <b>Sum of tests verbal learning*</b>         |                  |
| RAVLT                                        | Sum of tests     |
| WLT                                          | Immediate recall |
| CVLT                                         | -                |
| MATRICES                                     | -                |
| <b>Delayed verbal memory/ word retention</b> |                  |
| RAVLT                                        | Delayed recall   |
| WLT                                          | Retention rate   |

\* Immediate verbal memory was split into two categories as some studies reported the score of the first trial of a word learning task (trial 1 verbal memory), while others reported the sum of all immediate verbal memory trials (sum of tests verbal memory). As the second has a learning component to it and the first does not, these two were thought to measure something different and were thus taken separately. For example, the RAVLT has 5 immediate verbal learning trials and the first trial was put in the 'trial 1' category and the sum of the 5 trials into 'sum of trials'.

| Executive Function               | Test measure                    |
|----------------------------------|---------------------------------|
| <b>Set shifting:</b>             |                                 |
| WCST                             | Perseverative errors            |
| RST                              | accuracy                        |
| IED                              | Total errors (adjusted)         |
| <b>Abstract thinking</b>         |                                 |
| WCST                             | Categories completed            |
| <b>Cognitive flexibility:</b>    |                                 |
| TMT B ( or B-A)                  | Seconds or percentile           |
| DKEFS trail making switching     | -                               |
| <b>Cognitive inhibition:</b>     |                                 |
| Stroop interference              | -                               |
| Hayling Sentence Completion      | -                               |
| Go/NoGo                          | -                               |
| <b>Planning:</b>                 |                                 |
| SoC                              | Problems solved in min. moves   |
| ToL 3                            | Problems solved in min. moves   |
| Cantab OTS                       | Problems solved in first choice |
| <b>Verbal Fluency:</b>           |                                 |
| COWA/FAS                         | N word (phonemic)               |
| <b>Reasoning/problem solving</b> |                                 |
| WAIS picture arrangement         | -                               |
| MATRICES mazes                   | -                               |
| Raven                            | -                               |
| WAIS picture completion          | -                               |
| WAIS color matrix                | -                               |
| WAIS similarities                | -                               |

| Insufficient studies   | N studies |
|------------------------|-----------|
| gambling (CGT/IGT/BGT) | 3         |
| Affective GoNoGo       | 1         |
| DRT *                  | 1         |
| alternation learning   | 1         |
| OAT                    | 1         |
| RFFT                   | 1         |
| d2                     | 1         |
| Cantab SRM             | 1         |
| MMSE                   | 3         |
| WAIS information       | 4         |
| WAIS vocabulary        | 3         |
| NART                   | 2         |
| WRAT                   | 2         |
| WAIS IQ                | 2         |
| WASI                   | 1         |
| MWTB                   | 1         |
| Hinting task           | 1         |
| ToM                    | 1         |
| Mind in Eyes           | 1         |
| BFRT                   | 1         |

## 5. Quality assessment

Below you can find the questions from the National Institute of Health Quality Assessment Tool for Observational Cohort and Cross-Sectional Studies. Note that we did not use the question marked in grey, as they apply to prospective studies and we only included cross sectional data in our analysis.

1. Was the research question or objective in this paper clearly stated?
2. Was the study population clearly specified and defined?
3. Was the participation rate of eligible persons at least 50%?
4. Were all the subjects selected or recruited from the same or similar populations (including the same time period)? Were inclusion and exclusion criteria for being in the study pre-specified and applied uniformly to all participants?
5. Was a sample size justification, power description, or variance and effect estimates provided?
6. For the analyses in this paper, were the exposure(s) of interest measured prior to the outcome(s) being measured?
7. Was the timeframe sufficient so that one could reasonably expect to see an association between exposure and outcome if it existed?
8. For exposures that can vary in amount or level, did the study examine different levels of the exposure as related to the outcome (e.g., categories of exposure, or exposure measured as continuous variable)?
9. Were the exposure measures (independent variables) clearly defined, valid, reliable, and implemented consistently across all study participants?
10. Was the exposure(s) assessed more than once over time?
11. Were the outcome measures (dependent variables) clearly defined, valid, reliable, and implemented consistently across all study participants?
12. Were the outcome assessors blinded to the exposure status of participants?
13. Was loss to follow-up after baseline 20% or less?
14. Were key potential confounding variables measured and adjusted statistically for their impact on the relationship between exposure(s) and outcome(s)?

On the next page you will find the detailed quality assessment per question for each study.

| Author& Year       | 1   | 2   | 3   | 4   | 5   | 6   | 8   | 9   | 11  | 12  | 14  | Rating | Motivation               |
|--------------------|-----|-----|-----|-----|-----|-----|-----|-----|-----|-----|-----|--------|--------------------------|
| Berman 1998        | Yes | Yes | NR  | CD  | No  | No  | Yes | Yes | Yes | Yes | No  | Fair   |                          |
| Bleich-Cohen 2014  | Yes | Yes | NR  | Yes | No  | No  | No  | Yes | Yes | CD  | No  | Fair   |                          |
| Borkowska 2003     | Yes | Yes | NR  | CD  | No  | No  | No  | CD  | Yes | CD  | No  | Fair   |                          |
| Focseneanu 2016    | Yes | Yes | NR  | CD  | No  | No  | No  | No  | Yes | CD  | Yes | Fair   |                          |
| Frias 2014         | Yes | Yes | Yes | Yes | Yes | No  | No  | CD  | Yes | CD  | Yes | Fair   |                          |
| GROUP study        | Yes | Yes | NR  | CD  | No  | No  | No  | Yes | Yes | CD  | Yes | Fair   |                          |
| Hamid 2010         | Yes | Yes | NR  | Yes | No  | No  | No  | Yes | No  | No  | No  | Poor   | Many things not reported |
| Hermesh 2003       | Yes | Yes | NR  | CD  | No  | No  | Yes | Yes | Yes | Yes | No  | Fair   |                          |
| Hwang 2000         | Yes | Yes | NR  | CD  | No  | No  | No  | Yes | Yes | Yes | No  | Fair   |                          |
| Kazhungil 2017     | Yes | Yes | No  | Yes | No  | No  | No  | CD  | Yes | No  | Yes | Fair   |                          |
| Kim 2015           | Yes | Yes | CD  | Yes | No  | No  | No  | Yes | Yes | Yes | Yes | Fair   |                          |
| Kontis 2016        | Yes | Yes | Yes | Yes | Yes | No  | Yes | Yes | Yes | CD  | Yes | Fair   |                          |
| Kumbhani 2010      | Yes | Yes | NR  | CD  | Yes | No  | Yes | Yes | Yes | CD  | Yes | Fair   |                          |
| Lee 2009           | Yes | Yes | No  | Yes | No  | No  | Yes | Yes | Yes | Yes | Yes | Fair   |                          |
| Lysaker 2000       | Yes | Yes | NR  | CD  | Yes | No  | No  | Yes | Yes | No  | Yes | Fair   |                          |
| Lysaker 2002       | Yes | Yes | NR  | CD  | No  | No  | No  | Yes | Yes | CD  | Yes | Fair   |                          |
| Lysaker 2004       | Yes | Yes | NR  | CD  | No  | No  | Yes | Yes | Yes | Yes | Yes | Fair   |                          |
| Manheim study      | Yes | Yes | Yes | CD  | Yes | CD  | Yes | Yes | Yes | CD  | Yes | Fair   |                          |
| Meijer 2013        | Yes | Yes | NR  | CD  | Yes | No  | Yes | Yes | Yes | CD  | Yes | Fair   |                          |
| Michalopoulou 2014 | Yes | Yes | NR  | CD  | No  | No  | Yes | No  | Yes | CD  | Yes | Fair   |                          |
| Ntouros 2014       | Yes | Yes | NR  | CD  | Yes | No  | No  | Yes | Yes | CD  | Yes | Fair   |                          |
| Ongur 2005         | Yes | Yes | NR  | Yes | No  | No  | Yes | Yes | Yes | CD  | Yes | Fair   |                          |
| Patel 2010         | Yes | Yes | NR  | CD  | No  | No  | Yes | Yes | Yes | CD  | No  | Fair   |                          |
| Sahoo 2018         | Yes | Yes | NR  | CD  | Yes | No  | Yes | Yes | Yes | CD  | Yes | Fair   |                          |
| Tiryaki 2010       | Yes | Yes | NR  | CD  | No  | No  | Yes | Yes | Yes | No  | No  | Fair   |                          |
| Tonna 2019         | Yes | Yes | NR  | Yes | Yes | No  | Yes | Yes | Yes | CD  | No  | Fair   |                          |
| Tumkaya 2009       | Yes | Yes | NR  | Yes | Yes | No  | No  | Yes | Yes | Yes | No  | Fair   |                          |
| Veerman 2016       | Yes | Yes | No  | Yes | Yes | Yes | No  | Yes | Yes | Yes | Yes | Fair   |                          |
| Wang 2019          | Yes | Yes | NR  | CD  | No  | Yes | No  | No  | Yes | CD  | Yes | Fair   |                          |
| Whitney 2003       | Yes | Yes | NR  | CD  | Yes | No  | Yes | Yes | Yes | Yes | Yes | Fair   |                          |
| Whitton 2013       | Yes | Yes | NR  | CD  | Yes | No  | Yes | Yes | Yes | CD  | Yes | Fair   |                          |

Quality assessment for each study. CD=cannot determine and NR=not reported



## 6. Meta-analysis

In the following pages you can find an overview table of the meta-analysis including the post-hoc sensitivity analyses and the forest plots for each individual meta-analysis. Note that in all cases studies where patients without obsessive-compulsive symptoms performed better are plotted on the left and that studies where the patients with obsessive-compulsive symptoms performed better are plotted on the right. All studies are sorted by SMD from low to high in the forest plot.

### a. Meta-analysis overview table

| Cognitive domain                               | N studies | N patients | SMD           | Lower         | Upper         | p-value      | I <sup>2</sup> |
|------------------------------------------------|-----------|------------|---------------|---------------|---------------|--------------|----------------|
| <b>Attention</b>                               |           |            |               |               |               |              |                |
| Processing speed                               | 17        | 1946       | -0.133        | -0.300        | 0.033         | 0.117        | 43.009         |
| <i>*Processing speed: TMTA</i>                 | 9         | 612        | -0.177        | -0.406        | 0.052         | 0.129        | 42.069         |
| <i>**Processing speed: not purely RT based</i> | 12        | 1753       | <b>-0.190</b> | <b>-0.362</b> | <b>-0.019</b> | <b>0.029</b> | 36.574         |
| <i>**Processing speed: purely RT based</i>     | 9         | 489        | -0.105        | -0.413        | 0.203         | 0.504        | 55.279         |
| Sustained attention                            | 7         | 1457       | -0.107        | -0.271        | 0.058         | 0.205        | 14.176         |
| <b>Memory</b>                                  |           |            |               |               |               |              |                |
| Working memory                                 | 15        | 1949       | -0.030        | -0.201        | 0.141         | 0.729        | 43.787         |
| <i>*Working memory: digit span</i>             | 7         | 488        | -0.097        | -0.386        | 0.192         | 0.511        | 46.907         |
| Immediate visual memory                        | 11        | 619        | -0.03         | -0.277        | 0.216         | 0.810        | 51.027         |
| Delayed visual memory                          | 4         | 163        | 0.051         | -0.263        | 0.365         | 0.749        | 0              |
| Trial 1 verbal memory                          | 6         | 445        | 0.224         | -0.195        | 0.643         | 0.295        | 68.432         |
| Sum of trials verbal memory                    | 5         | 1281       | -0.035        | -0.302        | 0.232         | 0.798        | 50.493         |
| Delayed verbal memory                          | 6         | 1406       | 0.023         | -0.115        | 0.162         | 0.740        | 0              |
| <b>Executive function</b>                      |           |            |               |               |               |              |                |
| Fluency                                        | 9         | 427        | -0.123        | -0.512        | 0.265         | 0.534        | 73.091         |
| Cognitive inhibition                           | 10        | 576        | -0.208        | -0.489        | 0.074         | 0.148        | 57.745         |
| <i>*Cognitive inhibition: Stroop</i>           | 9         | 542        | -0.208        | -0.516        | 0.100         | 0.186        | 62.427         |
| Cognitive flexibility                          | 12        | 805        | -0.150        | -0.508        | 0.208         | 0.412        | 80.236         |
| <i>*Cognitive flexibility: TMTB seconds</i>    | 9         | 651        | -0.152        | -0.575        | 0.271         | 0.482        | 81.811         |
| Set shifting                                   | 13        | 1626       | -0.111        | -0.429        | 0.206         | 0.492        | 80.071         |
| <i>*Set shifting: WCST</i>                     | 10        | 596        | -0.081        | -0.549        | 0.387         | 0.735        | 83.392         |
| Abstract thinking                              | 12        | 772        | -0.168        | -0.407        | 0.071         | 0.169        | 50.696         |
| Planning                                       | 4         | 250        | -0.229        | -0.802        | 0.345         | 0.434        | 75.815         |
| Reasoning                                      | 6         | 260        | -0.281        | -0.776        | 0.214         | 0.265        | 73.487         |
| <b>Other</b>                                   |           |            |               |               |               |              |                |
| Facial affect recognition                      | 5         | 1164       | -0.093        | -0.367        | 0.182         | 0.507        | 33.738         |
| Visual spatial ability                         | 6         | 1304       | -0.038        | -0.352        | 0.275         | 0.810        | 62.005         |

Results from meta-analyses. Results marked with \* are subgroup analyses on specific cognitive tests done as sensitivity analyses. Results marked with \*\* are post-hoc subgroup analyses. N= number, SMD = standardized mean difference, Lower = lower limit of confidence interval, Upper = upper limit of confidence interval.

## b. Forest plots attention

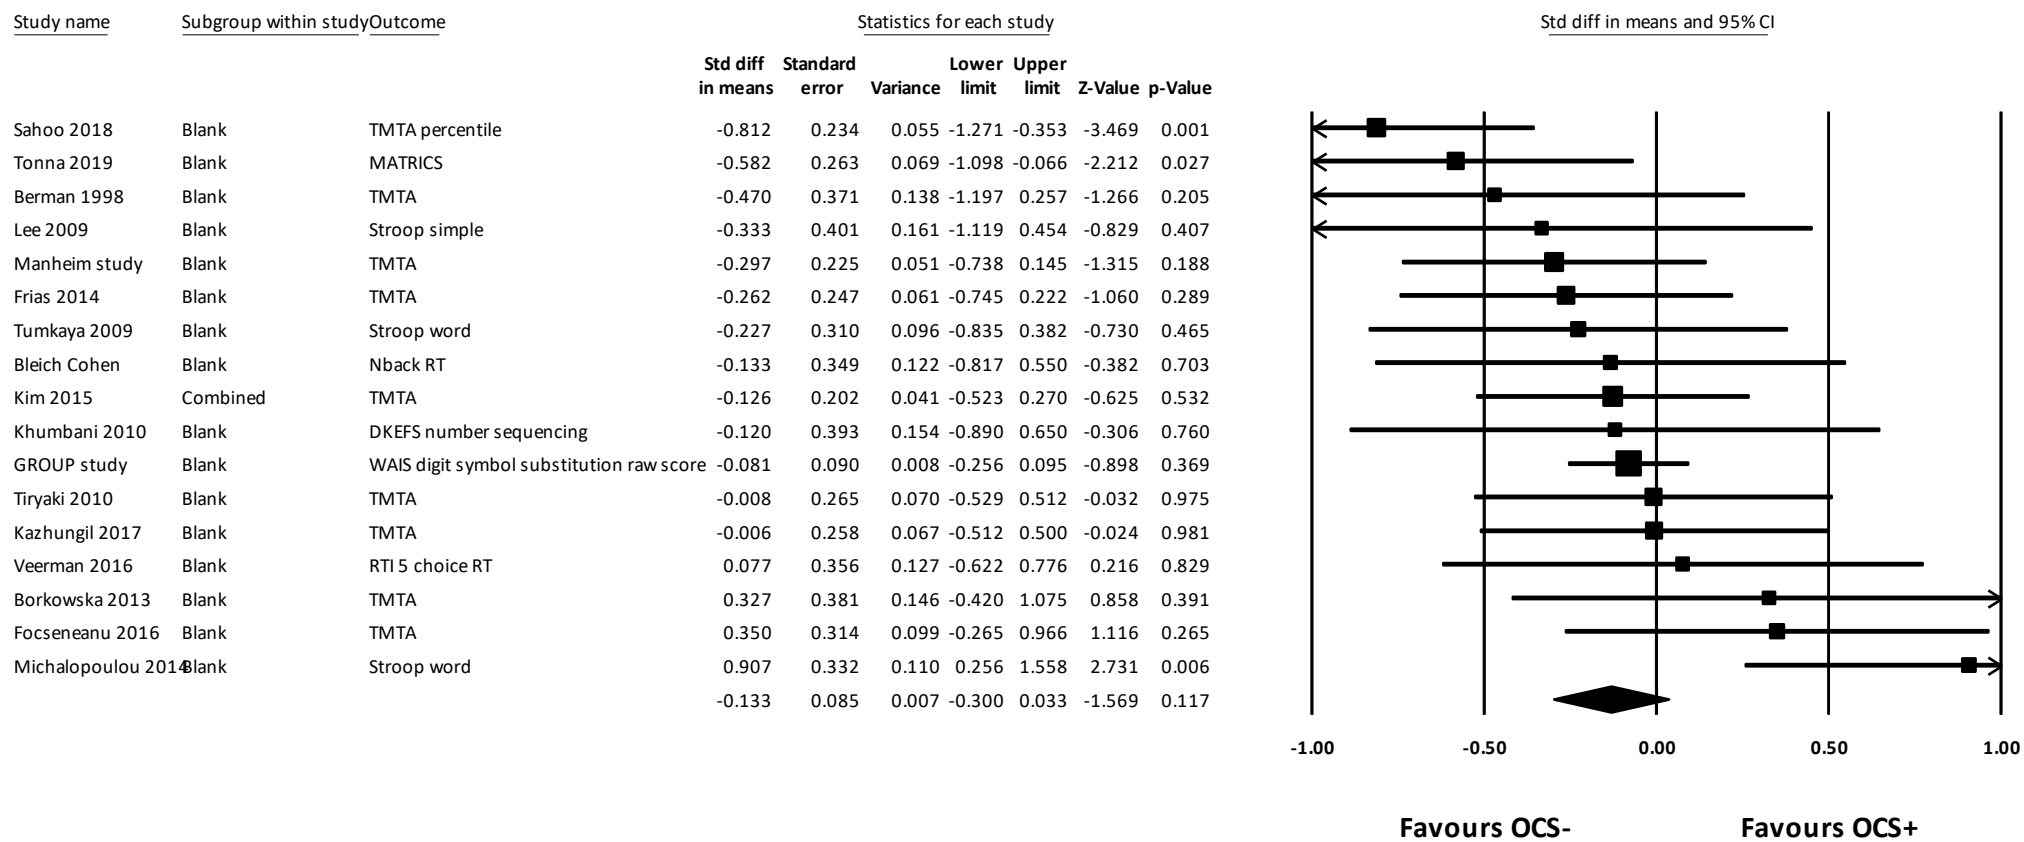

Figure 1 Forest plot processing speed overall

| Study name      | Subgroup within study | Outcome         | Statistics for each study |                |          |             |             |         |         |
|-----------------|-----------------------|-----------------|---------------------------|----------------|----------|-------------|-------------|---------|---------|
|                 |                       |                 | Std diff in means         | Standard error | Variance | Lower limit | Upper limit | Z-Value | p-Value |
| Sahoo 2018      | Blank                 | TMTA percentile | -0.812                    | 0.234          | 0.055    | -1.271      | -0.353      | -3.469  | 0.001   |
| Berman 1998     | Blank                 | TMTA            | -0.470                    | 0.371          | 0.138    | -1.197      | 0.257       | -1.266  | 0.205   |
| Manheim study   | Blank                 | TMTA            | -0.297                    | 0.225          | 0.051    | -0.738      | 0.145       | -1.315  | 0.188   |
| Frias 2014      | Blank                 | TMTA            | -0.262                    | 0.247          | 0.061    | -0.745      | 0.222       | -1.060  | 0.289   |
| Kim 2015        | Combined              | TMTA            | -0.126                    | 0.202          | 0.041    | -0.523      | 0.270       | -0.625  | 0.532   |
| Tiryaki 2010    | Blank                 | TMTA            | -0.008                    | 0.265          | 0.070    | -0.529      | 0.512       | -0.032  | 0.975   |
| Kazhungil 2017  | Blank                 | TMTA            | -0.006                    | 0.258          | 0.067    | -0.512      | 0.500       | -0.024  | 0.981   |
| Borkowska 2013  | Blank                 | TMTA            | 0.327                     | 0.381          | 0.146    | -0.420      | 1.075       | 0.858   | 0.391   |
| Focseneanu 2016 | Blank                 | TMTA            | 0.350                     | 0.314          | 0.099    | -0.265      | 0.966       | 1.116   | 0.265   |
|                 |                       |                 | -0.177                    | 0.117          | 0.014    | -0.406      | 0.052       | -1.518  | 0.129   |

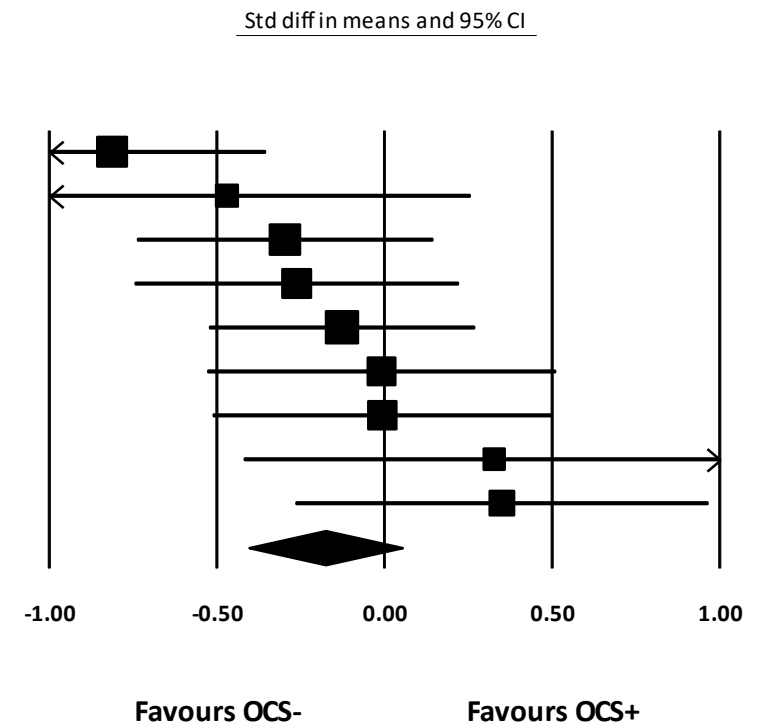

Figure 2 Forest plot processing speed: TMTA only

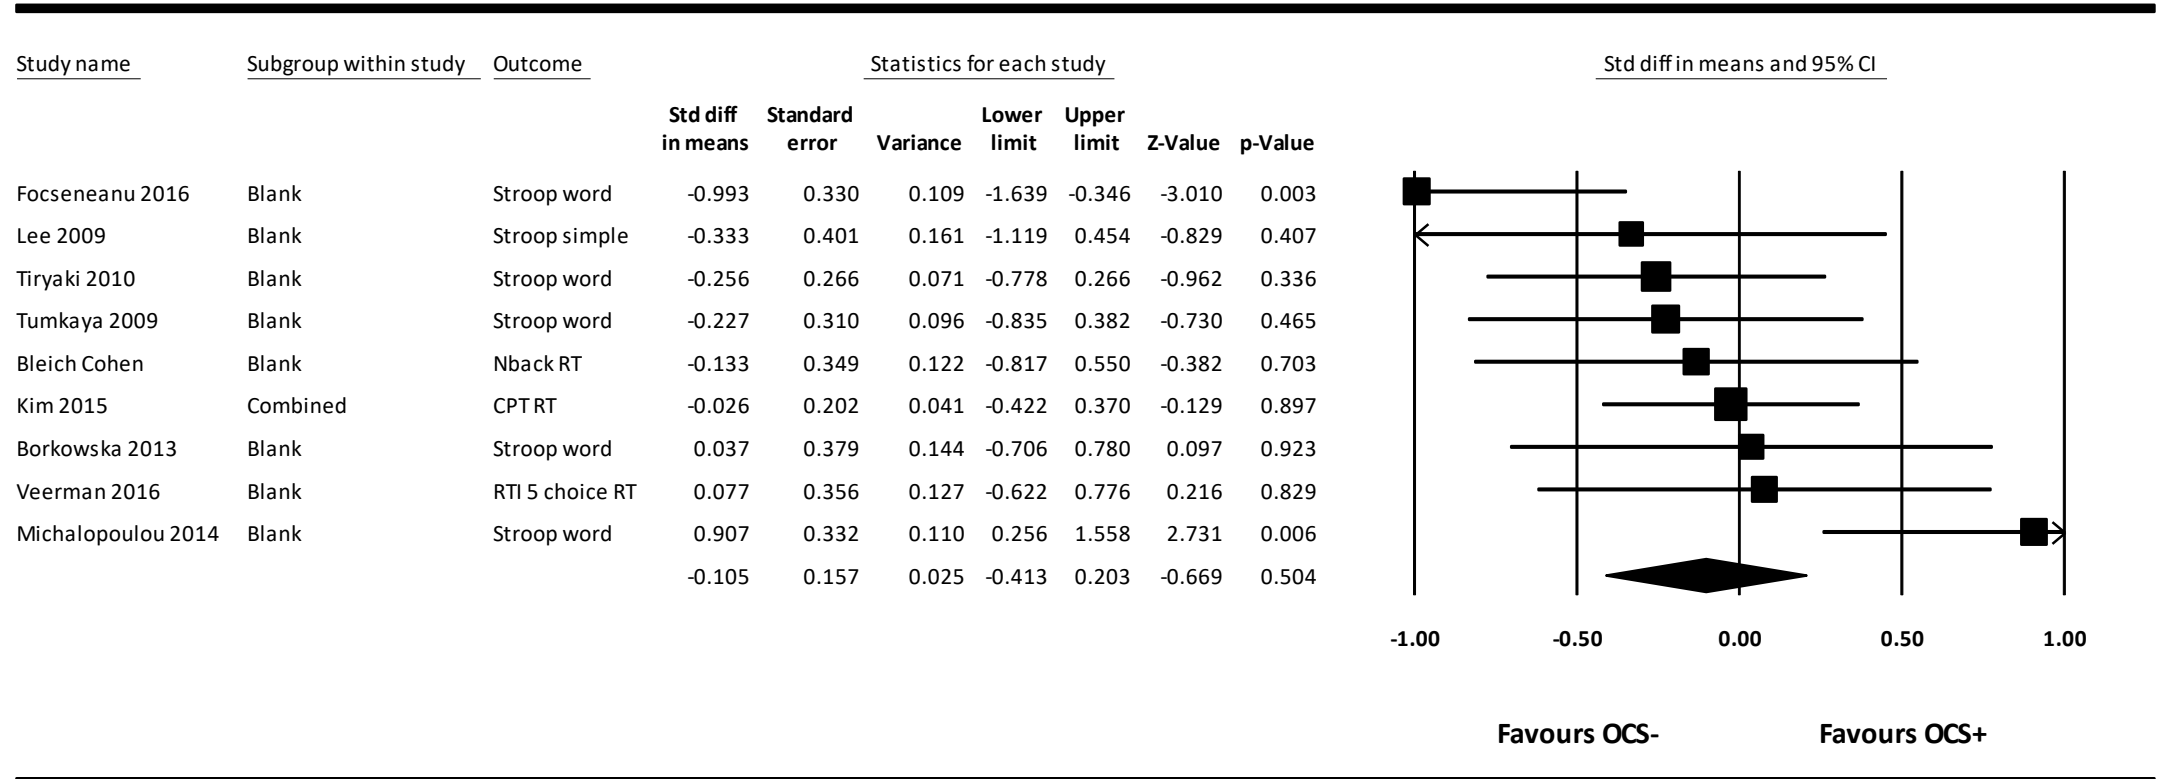

Figure 3 Forest plot processing speed: purely RT based

| Study name      | Subgroup within study | Outcome                                  | Statistics for each study |                |          |             |             | Std diff in means and 95% CI |         |
|-----------------|-----------------------|------------------------------------------|---------------------------|----------------|----------|-------------|-------------|------------------------------|---------|
|                 |                       |                                          | Std diff in means         | Standard error | Variance | Lower limit | Upper limit | Z-Value                      | p-Value |
| Sahoo 2018      | Blank                 | TMTA percentile                          | -0.812                    | 0.234          | 0.055    | -1.271      | -0.353      | -3.469                       | 0.001   |
| Tonna 2019      | Blank                 | MATRICES                                 | -0.582                    | 0.263          | 0.069    | -1.098      | -0.066      | -2.212                       | 0.027   |
| Berman 1998     | Blank                 | TMTA                                     | -0.470                    | 0.371          | 0.138    | -1.197      | 0.257       | -1.266                       | 0.205   |
| Manheim study   | Blank                 | TMTA                                     | -0.297                    | 0.225          | 0.051    | -0.738      | 0.145       | -1.315                       | 0.188   |
| Frias 2014      | Blank                 | TMTA                                     | -0.262                    | 0.247          | 0.061    | -0.745      | 0.222       | -1.060                       | 0.289   |
| Kim 2015        | Combined              | TMTA                                     | -0.126                    | 0.202          | 0.041    | -0.523      | 0.270       | -0.625                       | 0.532   |
| Khumbani 2010   | Blank                 | DKEFS number sequencing                  | -0.120                    | 0.393          | 0.154    | -0.890      | 0.650       | -0.306                       | 0.760   |
| GROUP study     | Blank                 | WAIS digit symbol substitution raw score | -0.081                    | 0.090          | 0.008    | -0.256      | 0.095       | -0.898                       | 0.369   |
| Tiryaki 2010    | Blank                 | TMTA                                     | -0.008                    | 0.265          | 0.070    | -0.529      | 0.512       | -0.032                       | 0.975   |
| Kazhungil 2017  | Blank                 | TMTA                                     | -0.006                    | 0.258          | 0.067    | -0.512      | 0.500       | -0.024                       | 0.981   |
| Borkowska 2013  | Blank                 | TMTA                                     | 0.327                     | 0.381          | 0.146    | -0.420      | 1.075       | 0.858                        | 0.391   |
| Focseneanu 2016 | Blank                 | TMTA                                     | 0.350                     | 0.314          | 0.099    | -0.265      | 0.966       | 1.116                        | 0.265   |
|                 |                       |                                          | -0.190                    | 0.087          | 0.008    | -0.362      | -0.019      | -2.180                       | 0.029   |

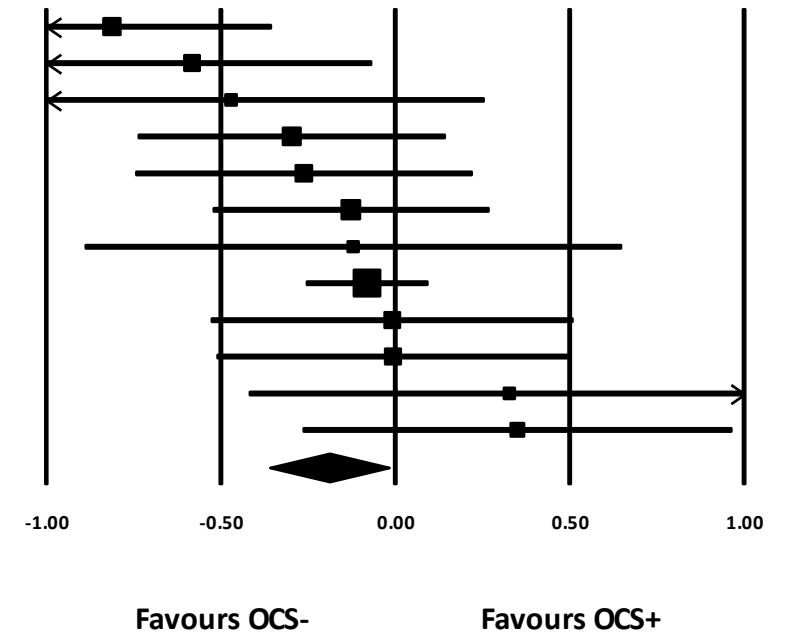

Figure 4 Forest plot processing speed: not purely RT based

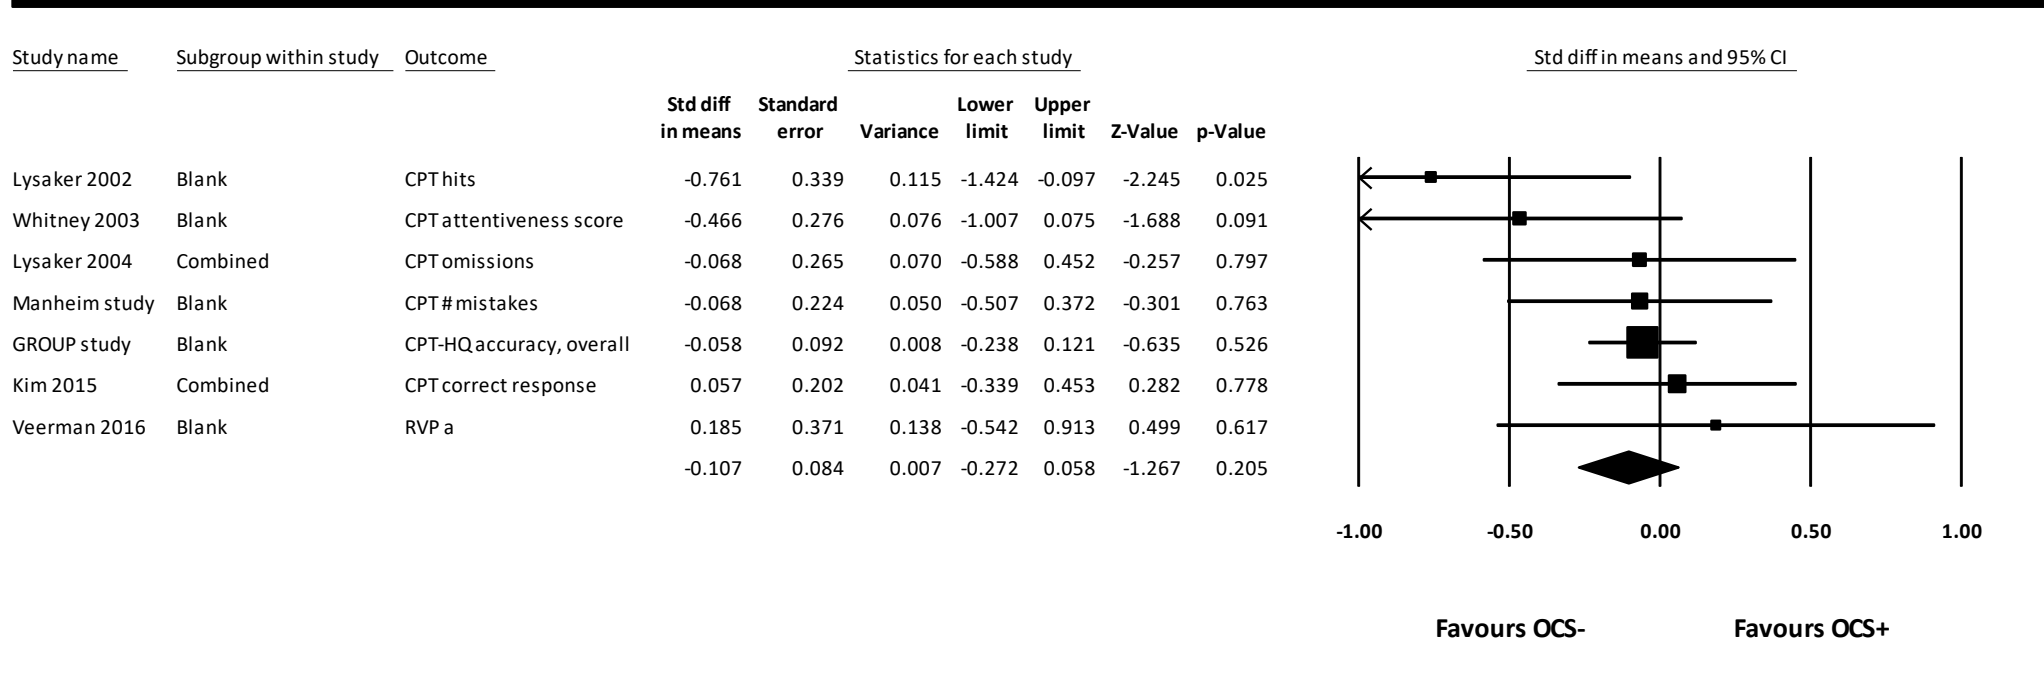

Figure 5 Forest plot sustained attention

### c. Forest plots memory

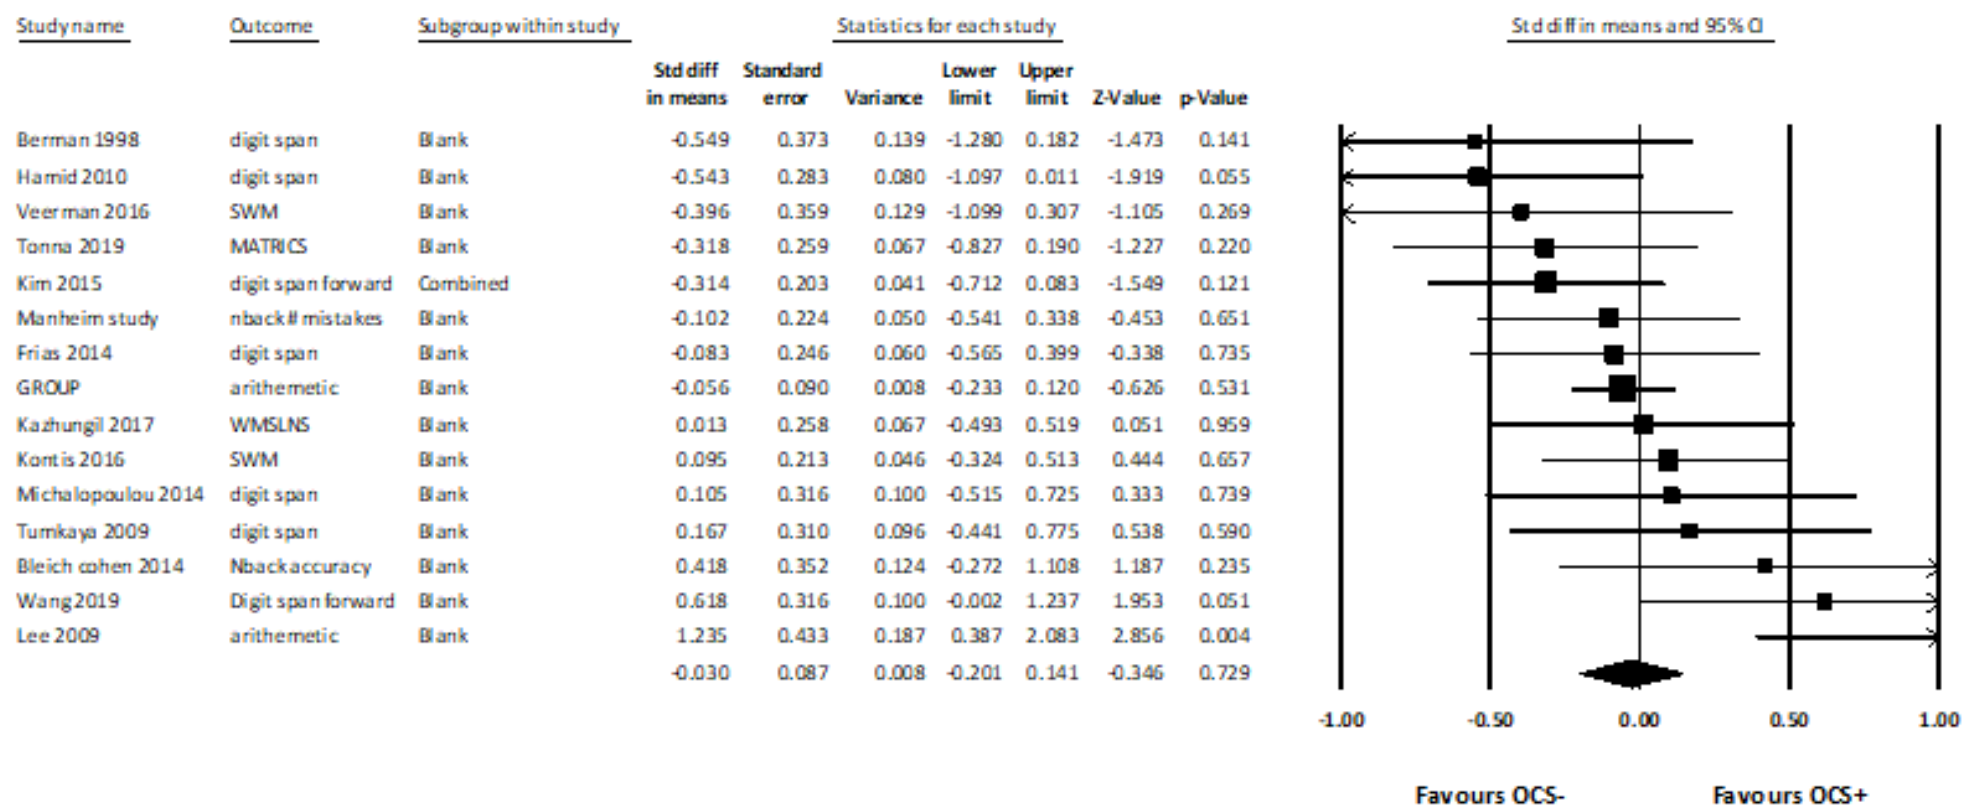

Figure 6 Forest plot working memory



| Study name         | Outcome            | Subgroup within study | Statistics for each study |                |          |             |             |         |         |
|--------------------|--------------------|-----------------------|---------------------------|----------------|----------|-------------|-------------|---------|---------|
|                    |                    |                       | Std diff in means         | Standard error | Variance | Lower limit | Upper limit | Z-Value | p-Value |
| Berman 1998        | digit span         | Blank                 | -0.549                    | 0.373          | 0.139    | -1.280      | 0.182       | -1.473  | 0.141   |
| Hamid 2010         | digit span         | Blank                 | -0.543                    | 0.283          | 0.080    | -1.097      | 0.011       | -1.919  | 0.055   |
| Kim 2015           | digit span forward | Combined              | -0.314                    | 0.203          | 0.041    | -0.712      | 0.083       | -1.549  | 0.121   |
| Frias 2014         | digit span         | Blank                 | -0.083                    | 0.246          | 0.060    | -0.565      | 0.399       | -0.338  | 0.735   |
| Michalopoulou 2014 | digit span         | Blank                 | 0.105                     | 0.316          | 0.100    | -0.515      | 0.725       | 0.333   | 0.739   |
| Tumkaya 2009       | digit span         | Blank                 | 0.167                     | 0.310          | 0.096    | -0.441      | 0.775       | 0.538   | 0.590   |
| Wang 2019          | Digit span forward | Blank                 | 0.618                     | 0.316          | 0.100    | -0.002      | 1.237       | 1.953   | 0.051   |
|                    |                    |                       | -0.097                    | 0.148          | 0.022    | -0.386      | 0.192       | -0.658  | 0.511   |

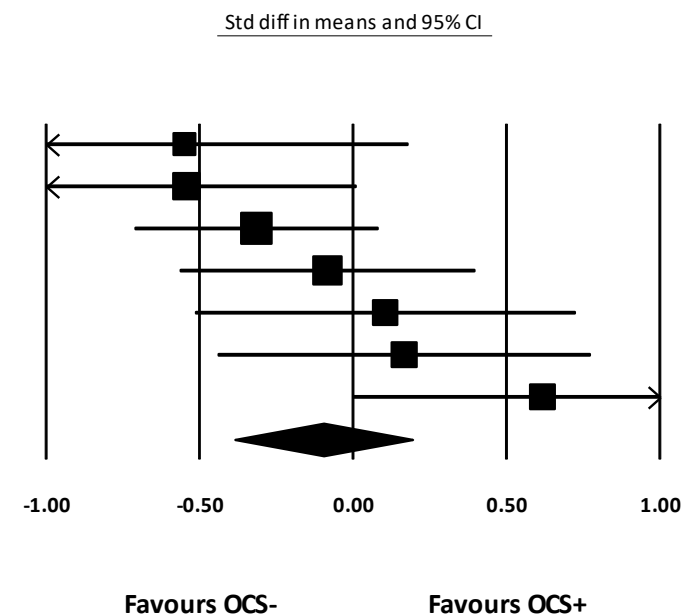

Figure 7 Forest plot working memory: digit span

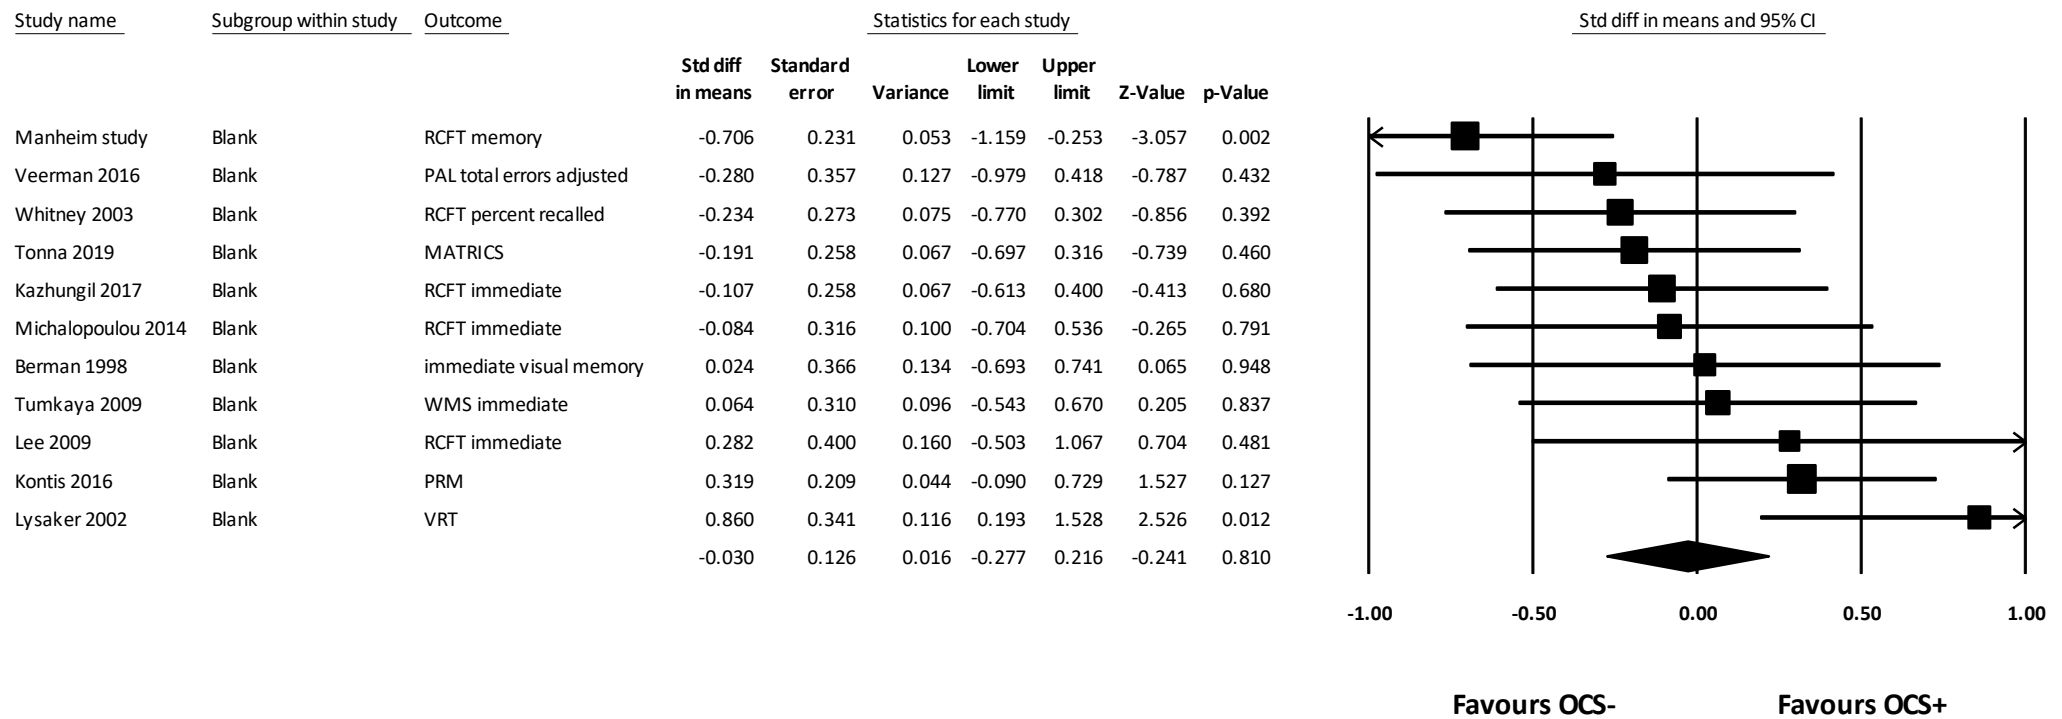

Figure 8 Forest plot immediate visual memory

| Study name     | Subgroup within study | Outcome               | Statistics for each study |                |          |             |             |         |         |
|----------------|-----------------------|-----------------------|---------------------------|----------------|----------|-------------|-------------|---------|---------|
|                |                       |                       | Std diff in means         | Standard error | Variance | Lower limit | Upper limit | Z-Value | p-Value |
| Berman 1998    | Blank                 | delayed visual memory | -0.440                    | 0.370          | 0.137    | -1.165      | 0.286       | -1.187  | 0.235   |
| Tumkaya 2009   | Blank                 | WMS delayed           | 0.113                     | 0.310          | 0.096    | -0.495      | 0.720       | 0.364   | 0.716   |
| Kazhungil 2017 | Blank                 | RCFT delayed          | 0.181                     | 0.259          | 0.067    | -0.326      | 0.688       | 0.700   | 0.484   |
| Lee 2009       | Blank                 | RCFT delayed          | 0.210                     | 0.400          | 0.160    | -0.573      | 0.993       | 0.526   | 0.599   |
|                |                       |                       | 0.051                     | 0.160          | 0.026    | -0.263      | 0.365       | 0.319   | 0.749   |

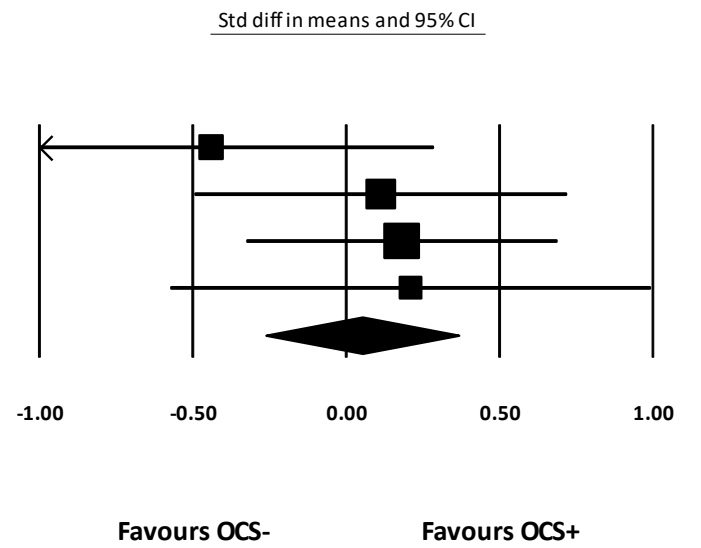

Figure 9 Forest plot delayed visual memory

| Study name     | Subgroup within study | Outcome                 | Statistics for each study |                |          |             |             | Std diff in means and 95% CI |         |
|----------------|-----------------------|-------------------------|---------------------------|----------------|----------|-------------|-------------|------------------------------|---------|
|                |                       |                         | Std diff in means         | Standard error | Variance | Lower limit | Upper limit | Z-Value                      | p-Value |
| Hamid 2010     | Blank                 | RAVLT trial 1           | -0.425                    | 0.282          | 0.079    | -0.977      | 0.127       | -1.510                       | 0.131   |
| Kim 2015       | Combined              | RAVLT A1                | -0.234                    | 0.203          | 0.041    | -0.631      | 0.163       | -1.157                       | 0.247   |
| Kazhungil 2017 | Blank                 | RAVLT immediate recall  | 0.169                     | 0.259          | 0.067    | -0.338      | 0.676       | 0.653                        | 0.514   |
| Veerman 2016   | Blank                 | VRM phase 1             | 0.490                     | 0.358          | 0.128    | -0.211      | 1.192       | 1.370                        | 0.171   |
| Tumkaya 2009   | Blank                 | RAVLT short term memory | 0.689                     | 0.318          | 0.101    | 0.066       | 1.312       | 2.168                        | 0.030   |
| Lee 2009       | Blank                 | RAVLT trial 1           | 1.040                     | 0.423          | 0.179    | 0.211       | 1.869       | 2.460                        | 0.014   |
|                |                       |                         | 0.224                     | 0.214          | 0.046    | -0.195      | 0.643       | 1.048                        | 0.295   |

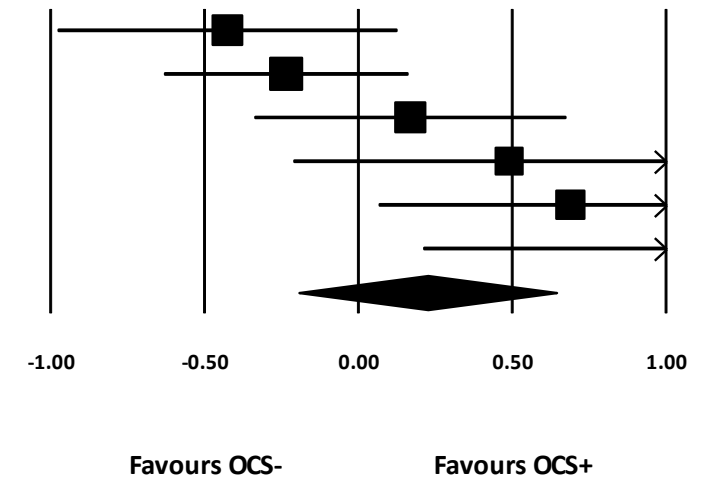

Figure 10 Forest plot trial 1 verbal memory

| Study name      | Subgroup within study | Outcome                                    | Statistics for each study |                |          |             |             | Std diff in means and 95% CI |         |
|-----------------|-----------------------|--------------------------------------------|---------------------------|----------------|----------|-------------|-------------|------------------------------|---------|
|                 |                       |                                            | Std diff in means         | Standard error | Variance | Lower limit | Upper limit | Z-Value                      | p-Value |
| Manheim study   | Blank                 | RAVLT immediate recall                     | -0.381                    | 0.226          | 0.051    | -0.824      | 0.063       | -1.683                       | 0.092   |
| Whitney 2003    | Blank                 | CVLT                                       | -0.220                    | 0.273          | 0.075    | -0.755      | 0.316       | -0.804                       | 0.422   |
| Tonna 2019      | Blank                 | MATRICES                                   | -0.148                    | 0.258          | 0.067    | -0.654      | 0.358       | -0.574                       | 0.566   |
| GROUP study     | Blank                 | 15WLT total items correct immediate recall | 0.049                     | 0.090          | 0.008    | -0.126      | 0.225       | 0.551                        | 0.581   |
| Focseneanu 2016 | Blank                 | RAVLT sum of tests                         | 0.636                     | 0.319          | 0.102    | 0.010       | 1.262       | 1.993                        | 0.046   |
|                 |                       |                                            | -0.035                    | 0.136          | 0.019    | -0.302      | 0.232       | -0.256                       | 0.798   |

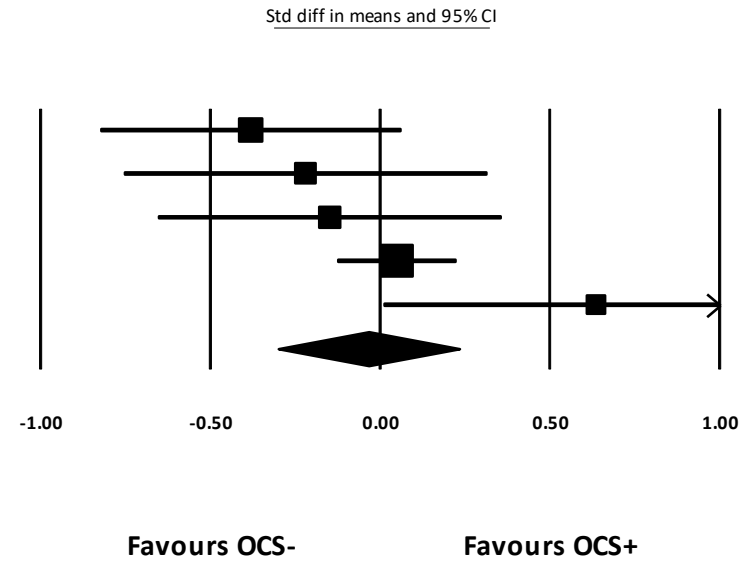

Figure 11 Forest plot sum of tests verbal memory

| Study name     | Subgroup within study | Outcome                   | Statistics for each study |                |          |             |             |         | Std diff in means and 95% CI |  |
|----------------|-----------------------|---------------------------|---------------------------|----------------|----------|-------------|-------------|---------|------------------------------|--|
|                |                       |                           | Std diff in means         | Standard error | Variance | Lower limit | Upper limit | Z-Value | p-Value                      |  |
| Tumkaya 2009   | Blank                 | RAVLT delayed free recall | -0.203                    | 0.310          | 0.096    | -0.811      | 0.405       | -0.653  | 0.514                        |  |
| Manheim study  | Blank                 | RAVLT delayed recall      | -0.200                    | 0.225          | 0.051    | -0.641      | 0.241       | -0.890  | 0.374                        |  |
| Lee 2009       | Blank                 | RAVLT delayed recall      | -0.198                    | 0.399          | 0.160    | -0.981      | 0.585       | -0.495  | 0.620                        |  |
| GROUP          | Blank                 | WLT delayed items correct | 0.035                     | 0.090          | 0.008    | -0.141      | 0.211       | 0.387   | 0.699                        |  |
| Kim 2015       | Combined              | RAVLT delayed             | 0.167                     | 0.202          | 0.041    | -0.229      | 0.564       | 0.828   | 0.408                        |  |
| Kazhungil 2017 | Blank                 | RAVLT delayed recall      | 0.241                     | 0.259          | 0.067    | -0.267      | 0.749       | 0.931   | 0.352                        |  |
|                |                       |                           | 0.023                     | 0.071          | 0.005    | -0.115      | 0.162       | 0.332   | 0.740                        |  |

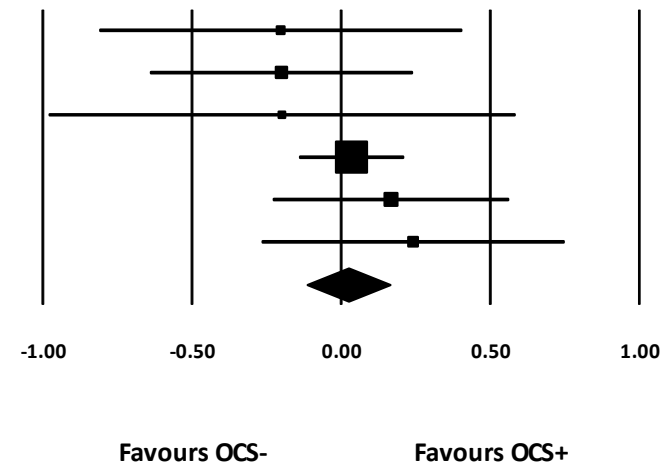

Figure 12 Forest plot delayed verbal memory

### d. Forest plots executive function

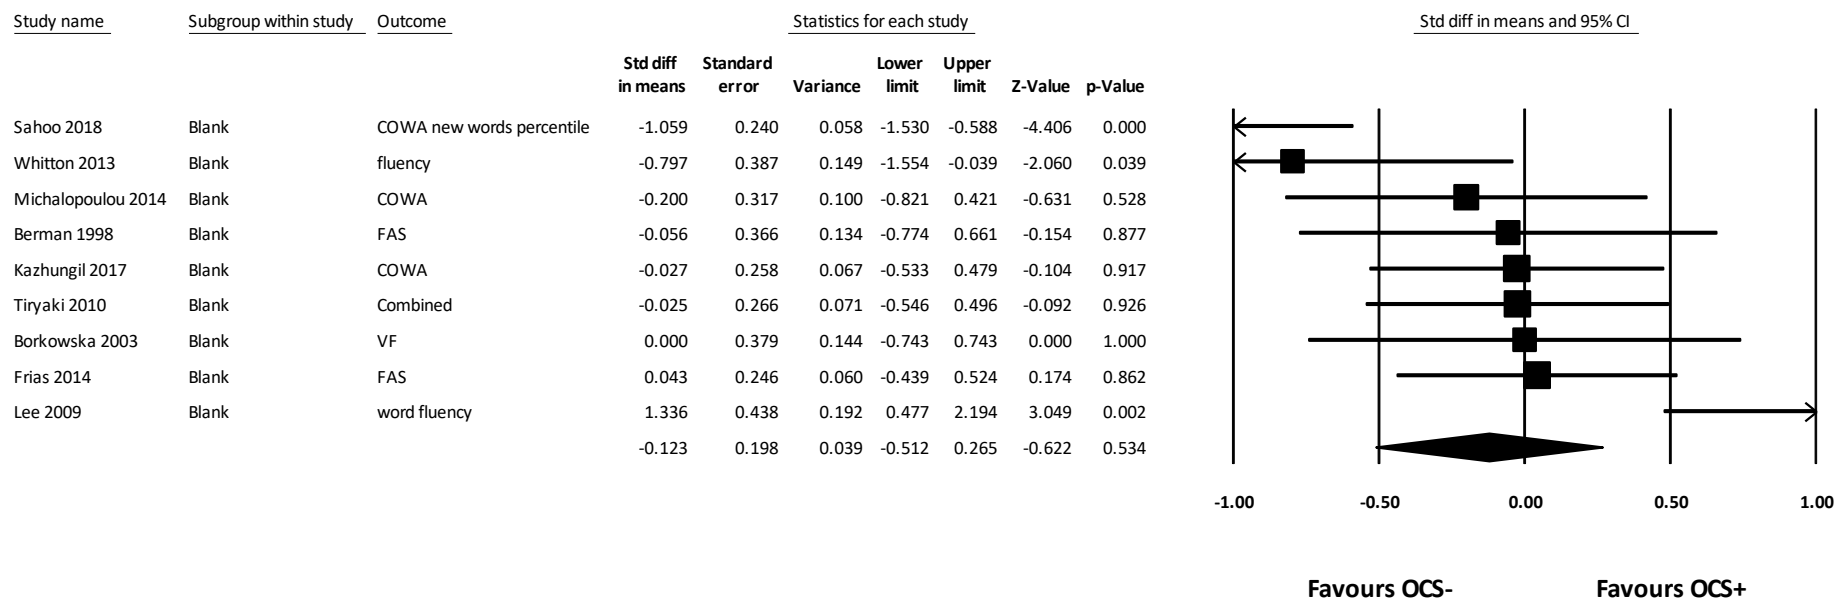

Figure 13 Forest plot fluency

| Study name      | Subgroup within study | Outcome                  | Statistics for each study |                |          |             |             |         |         |
|-----------------|-----------------------|--------------------------|---------------------------|----------------|----------|-------------|-------------|---------|---------|
|                 |                       |                          | Std diff in means         | Standard error | Variance | Lower limit | Upper limit | Z-Value | p-Value |
| Ongur 2005      | Blank                 | Stroop interference      | -1.116                    | 0.294          | 0.086    | -1.692      | -0.540      | -3.799  | 0.000   |
| Lee 2009        | Blank                 | Stroop interference      | -1.002                    | 0.421          | 0.177    | -1.828      | -0.177      | -2.379  | 0.017   |
| Manheim study   | Blank                 | Stroop interference      | -0.435                    | 0.227          | 0.051    | -0.879      | 0.010       | -1.916  | 0.055   |
| Whitton 2013    | Blank                 | HSCT                     | -0.221                    | 0.361          | 0.131    | -0.930      | 0.487       | -0.612  | 0.540   |
| Tiryaki 2010    | Blank                 | Stroop 3                 | -0.143                    | 0.266          | 0.071    | -0.664      | 0.378       | -0.538  | 0.590   |
| Sahoo 2018      | Blank                 | Stroop effect percentile | 0.039                     | 0.225          | 0.051    | -0.402      | 0.480       | 0.175   | 0.861   |
| Tumkaya 2009    | Blank                 | Stroop interference      | 0.089                     | 0.310          | 0.096    | -0.518      | 0.696       | 0.287   | 0.774   |
| Borkowska 2003  | Blank                 | Stroop interference      | 0.105                     | 0.385          | 0.149    | -0.650      | 0.861       | 0.273   | 0.785   |
| Focseneanu 2016 | Blank                 | Stroop interference      | 0.189                     | 0.313          | 0.098    | -0.424      | 0.801       | 0.604   | 0.546   |
| Kazhungil 2017  | Blank                 | Stroop interference      | 0.222                     | 0.259          | 0.067    | -0.285      | 0.730       | 0.859   | 0.391   |
|                 |                       |                          | -0.208                    | 0.144          | 0.021    | -0.489      | 0.074       | -1.446  | 0.148   |

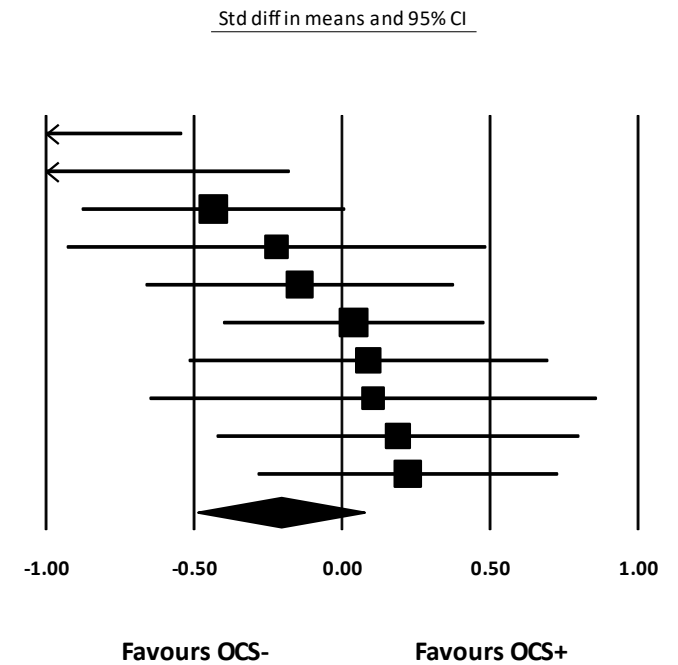

Figure 14 Forest plot cognitive inhibition



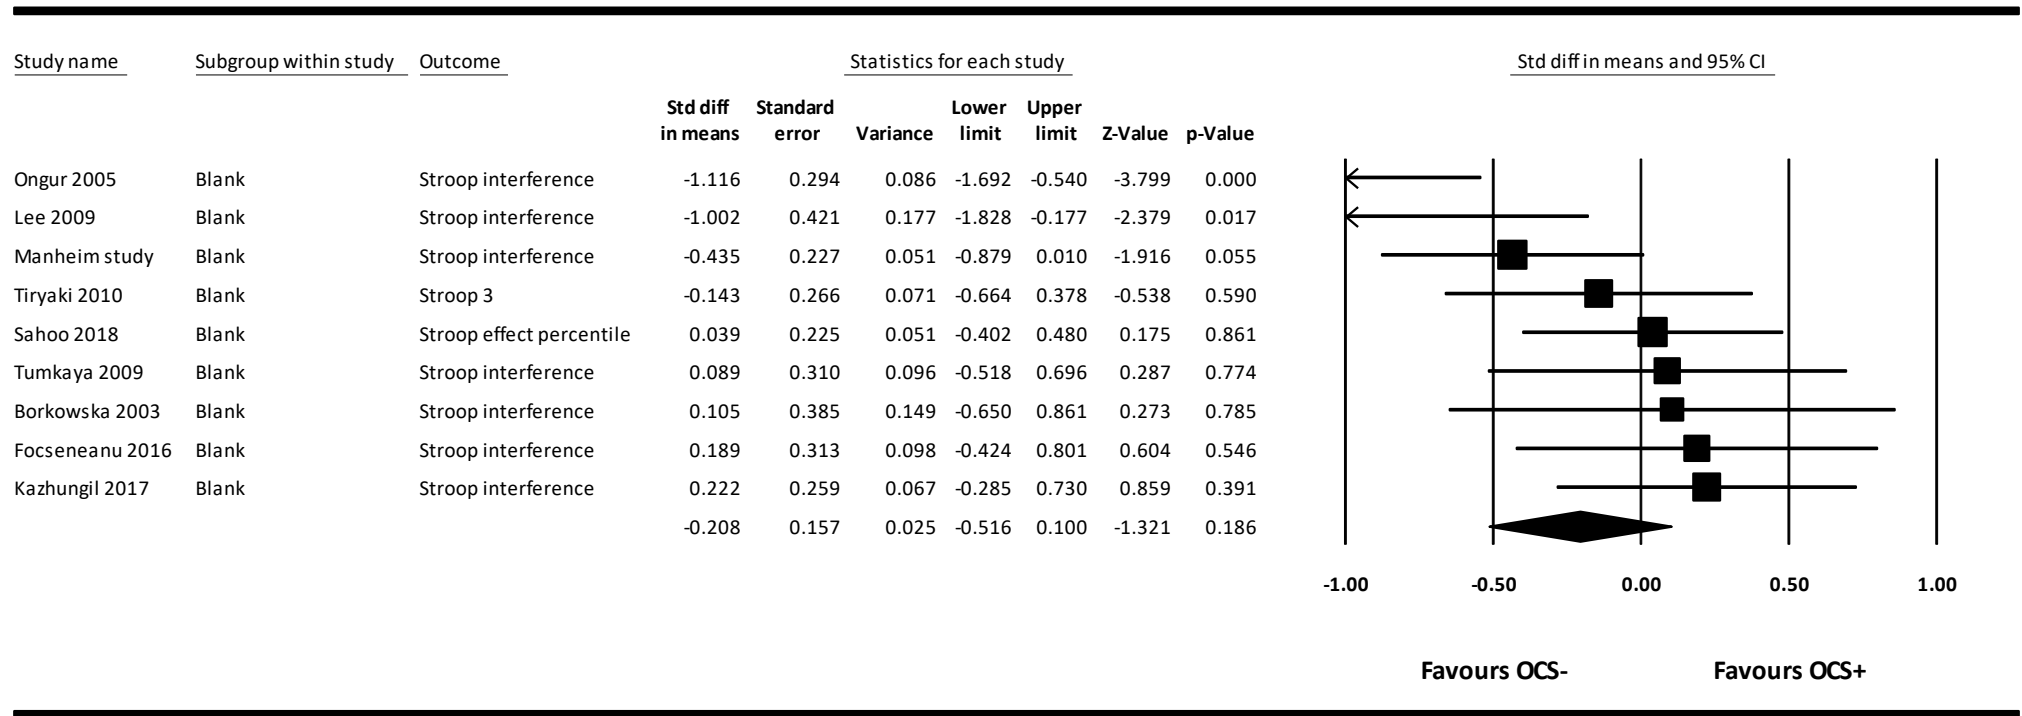

Figure 15 Forest plot cognitive inhibition: Stroop only

| Study name      | Subgroup within study | Outcome               | Statistics for each study |                |          |             |             | Std diff in means and 95% CI |         |
|-----------------|-----------------------|-----------------------|---------------------------|----------------|----------|-------------|-------------|------------------------------|---------|
|                 |                       |                       | Std diff in means         | Standard error | Variance | Lower limit | Upper limit | Z-Value                      | p-Value |
| Ongur 2005      | Blank                 | TMTB seconds          | -1.643                    | 0.304          | 0.092    | -2.239      | -1.047      | -5.403                       | 0.000   |
| Sahoo 2018      | Blank                 | TMTB percentile       | -0.852                    | 0.235          | 0.055    | -1.313      | -0.392      | -3.626                       | 0.000   |
| Manheim study   | Blank                 | TMTB seconds          | -0.467                    | 0.227          | 0.052    | -0.912      | -0.022      | -2.055                       | 0.040   |
| Berman 1998     | Blank                 | TMTB seconds          | -0.460                    | 0.371          | 0.137    | -1.186      | 0.267       | -1.240                       | 0.215   |
| Frias 2014      | Blank                 | TMTB seconds          | -0.230                    | 0.246          | 0.061    | -0.713      | 0.253       | -0.934                       | 0.350   |
| Kazhungil 2017  | Blank                 | TMTB seconds          | -0.123                    | 0.258          | 0.067    | -0.630      | 0.384       | -0.476                       | 0.634   |
| Kim 2015        | Combined              | TMTB seconds          | -0.063                    | 0.203          | 0.041    | -0.461      | 0.334       | -0.313                       | 0.754   |
| Tiryaki 2010    | Blank                 | TMTB seconds          | 0.237                     | 0.266          | 0.071    | -0.285      | 0.759       | 0.889                        | 0.374   |
| Kumbhani 2010   | Blank                 | DKEFS trial switching | 0.262                     | 0.396          | 0.156    | -0.513      | 1.038       | 0.663                        | 0.507   |
| Tumkaya 2009    | Blank                 | TMT B-A               | 0.295                     | 0.311          | 0.097    | -0.314      | 0.905       | 0.950                        | 0.342   |
| Borkowska 2003  | Blank                 | TMTB seconds          | 0.460                     | 0.384          | 0.147    | -0.292      | 1.213       | 1.199                        | 0.231   |
| Focseneanu 2016 | Blank                 | TMTB seconds          | 1.013                     | 0.330          | 0.109    | 0.365       | 1.660       | 3.065                        | 0.002   |
|                 |                       |                       | -0.150                    | 0.183          | 0.033    | -0.508      | 0.208       | -0.820                       | 0.412   |

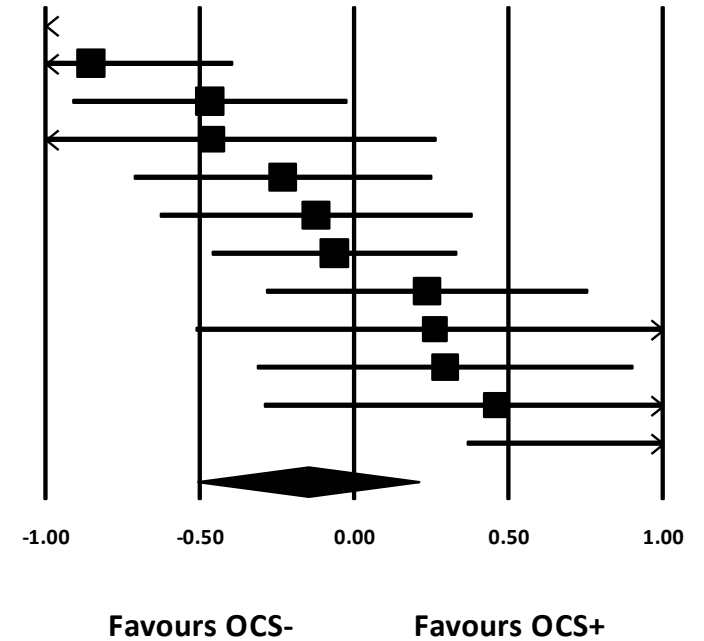

Figure 16 Forest plot cognitive flexibility

| Study name      | Subgroup within study | Outcome      | Statistics for each study |                |          |             |             | Std diff in means and 95% CI |         |
|-----------------|-----------------------|--------------|---------------------------|----------------|----------|-------------|-------------|------------------------------|---------|
|                 |                       |              | Std diff in means         | Standard error | Variance | Lower limit | Upper limit | Z-Value                      | p-Value |
| Ongur 2005      | Blank                 | TMTB seconds | -1.643                    | 0.304          | 0.092    | -2.239      | -1.047      | -5.403                       | 0.000   |
| Manheim study   | Blank                 | TMTB seconds | -0.467                    | 0.227          | 0.052    | -0.912      | -0.022      | -2.055                       | 0.040   |
| Berman 1998     | Blank                 | TMTB seconds | -0.460                    | 0.371          | 0.137    | -1.186      | 0.267       | -1.240                       | 0.215   |
| Frias 2014      | Blank                 | TMTB seconds | -0.230                    | 0.246          | 0.061    | -0.713      | 0.253       | -0.934                       | 0.350   |
| Kazhungil 2017  | Blank                 | TMTB seconds | -0.123                    | 0.258          | 0.067    | -0.630      | 0.384       | -0.476                       | 0.634   |
| Kim 2015        | Combined              | TMTB seconds | -0.063                    | 0.203          | 0.041    | -0.461      | 0.334       | -0.313                       | 0.754   |
| Tiryaki 2010    | Blank                 | TMTB seconds | 0.237                     | 0.266          | 0.071    | -0.285      | 0.759       | 0.889                        | 0.374   |
| Borkowska 2003  | Blank                 | TMTB seconds | 0.460                     | 0.384          | 0.147    | -0.292      | 1.213       | 1.199                        | 0.231   |
| Focseneanu 2016 | Blank                 | TMTB seconds | 1.013                     | 0.330          | 0.109    | 0.365       | 1.660       | 3.065                        | 0.002   |
|                 |                       |              | -0.152                    | 0.216          | 0.047    | -0.575      | 0.271       | -0.704                       | 0.482   |

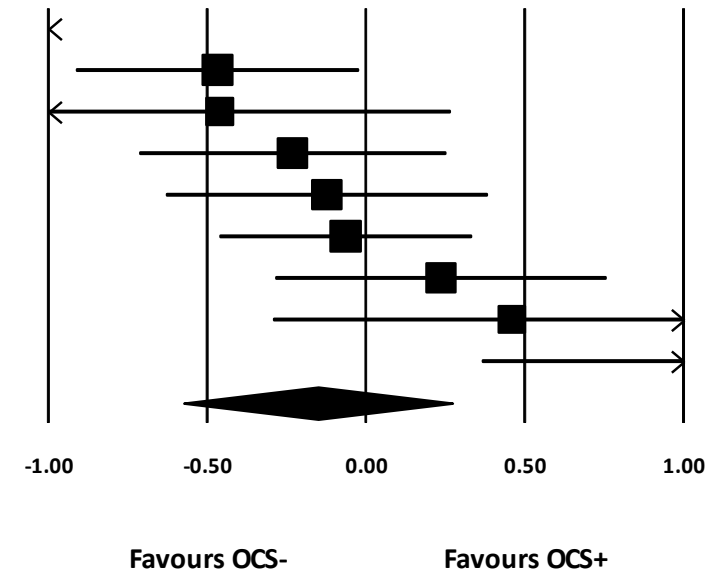

Figure 17 Forest plot cognitive flexibility: TMTB seconds

| Study name         | Subgroup within study | Outcome                   | Statistics for each study |                |          |             |             |         |         |
|--------------------|-----------------------|---------------------------|---------------------------|----------------|----------|-------------|-------------|---------|---------|
|                    |                       |                           | Std diff in means         | Standard error | Variance | Lower limit | Upper limit | Z-Value | p-Value |
| Hwang 2000         | Blank                 | WCST perseverative errors | -1.262                    | 0.490          | 0.240    | -2.222      | -0.302      | -2.577  | 0.010   |
| Patel 2010         | Blank                 | IED                       | -1.001                    | 0.405          | 0.164    | -1.794      | -0.208      | -2.474  | 0.013   |
| Manheim study      | Blank                 | WCST perseverative errors | -0.811                    | 0.233          | 0.054    | -1.268      | -0.354      | -3.477  | 0.001   |
| Michalopoulou 2014 | Blank                 | WCST perseverative errors | -0.540                    | 0.322          | 0.104    | -1.170      | 0.091       | -1.676  | 0.094   |
| Hermesh 2003       | Blank                 | WCST perseverative errors | -0.445                    | 0.321          | 0.103    | -1.073      | 0.183       | -1.388  | 0.165   |
| Kumbhani 2010      | Blank                 | WCST perseverative errors | -0.345                    | 0.398          | 0.158    | -1.125      | 0.435       | -0.867  | 0.386   |
| Lysaker 2000       | Blank                 | WCST perseverative errors | -0.139                    | 0.296          | 0.088    | -0.720      | 0.441       | -0.471  | 0.638   |
| GROUP study        | Blank                 | RST cost score index      | 0.007                     | 0.093          | 0.009    | -0.176      | 0.189       | 0.071   | 0.944   |
| Kontis 2016        | Blank                 | IED                       | 0.035                     | 0.211          | 0.044    | -0.378      | 0.448       | 0.168   | 0.866   |
| Whitney 2003       | Blank                 | WCST perseverative errors | 0.144                     | 0.273          | 0.074    | -0.390      | 0.679       | 0.529   | 0.597   |
| Kazhungil 2017     | Blank                 | WCST perseverative errors | 0.297                     | 0.260          | 0.067    | -0.212      | 0.806       | 1.143   | 0.253   |
| Tumkaya 2009       | Blank                 | WCST perseverative errors | 0.499                     | 0.314          | 0.099    | -0.116      | 1.115       | 1.591   | 0.112   |
| Ongur 2005         | Blank                 | WCST perseverative errors | 1.535                     | 0.302          | 0.091    | 0.944       | 2.126       | 5.087   | 0.000   |
|                    |                       |                           | -0.111                    | 0.162          | 0.026    | -0.429      | 0.206       | -0.688  | 0.492   |

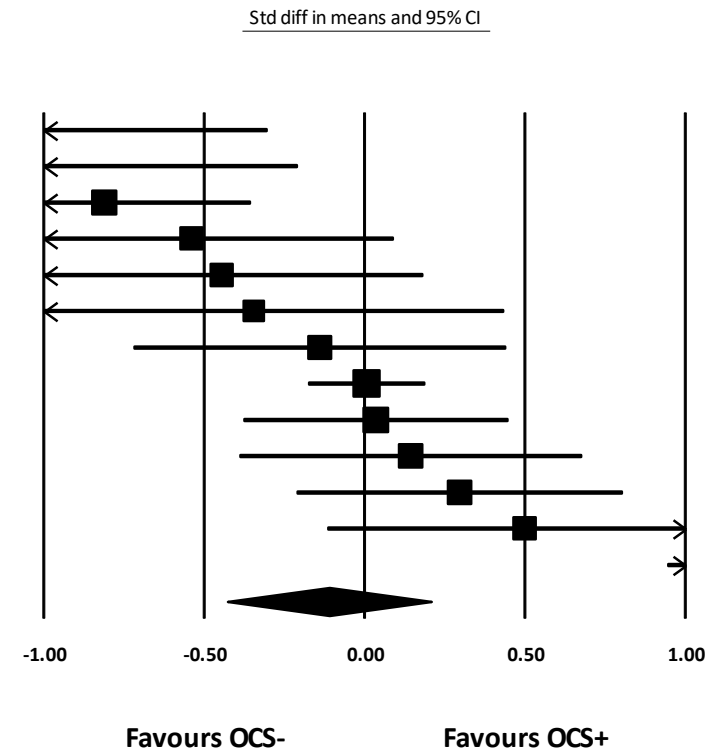

Figure 18 Forest plot set shifting

| Study name         | Subgroup within study | Outcome                   | Statistics for each study |                |          |             |             | Std diff in means and 95% CI |         |
|--------------------|-----------------------|---------------------------|---------------------------|----------------|----------|-------------|-------------|------------------------------|---------|
|                    |                       |                           | Std diff in means         | Standard error | Variance | Lower limit | Upper limit | Z-Value                      | p-Value |
| Hwang 2000         | Blank                 | WCST perseverative errors | -1.262                    | 0.490          | 0.240    | -2.222      | -0.302      | -2.577                       | 0.010   |
| Manheim study      | Blank                 | WCST perseverative errors | -0.811                    | 0.233          | 0.054    | -1.268      | -0.354      | -3.477                       | 0.001   |
| Michalopoulou 2014 | Blank                 | WCST perseverative errors | -0.540                    | 0.322          | 0.104    | -1.170      | 0.091       | -1.676                       | 0.094   |
| Hermesh 2003       | Blank                 | WCST perseverative errors | -0.445                    | 0.321          | 0.103    | -1.073      | 0.183       | -1.388                       | 0.165   |
| Kumbhani 2010      | Blank                 | WCST perseverative errors | -0.345                    | 0.398          | 0.158    | -1.125      | 0.435       | -0.867                       | 0.386   |
| Lysaker 2000       | Blank                 | WCST perseverative errors | -0.139                    | 0.296          | 0.088    | -0.720      | 0.441       | -0.471                       | 0.638   |
| Whitney 2003       | Blank                 | WCST perseverative errors | 0.144                     | 0.273          | 0.074    | -0.390      | 0.679       | 0.529                        | 0.597   |
| Kazhungil 2017     | Blank                 | WCST perseverative errors | 0.297                     | 0.260          | 0.067    | -0.212      | 0.806       | 1.143                        | 0.253   |
| Tumkaya 2009       | Blank                 | WCST perseverative errors | 0.499                     | 0.314          | 0.099    | -0.116      | 1.115       | 1.591                        | 0.112   |
| Ongur 2005         | Blank                 | WCST perseverative errors | 1.535                     | 0.302          | 0.091    | 0.944       | 2.126       | 5.087                        | 0.000   |
|                    |                       |                           | -0.081                    | 0.239          | 0.057    | -0.549      | 0.387       | -0.338                       | 0.735   |

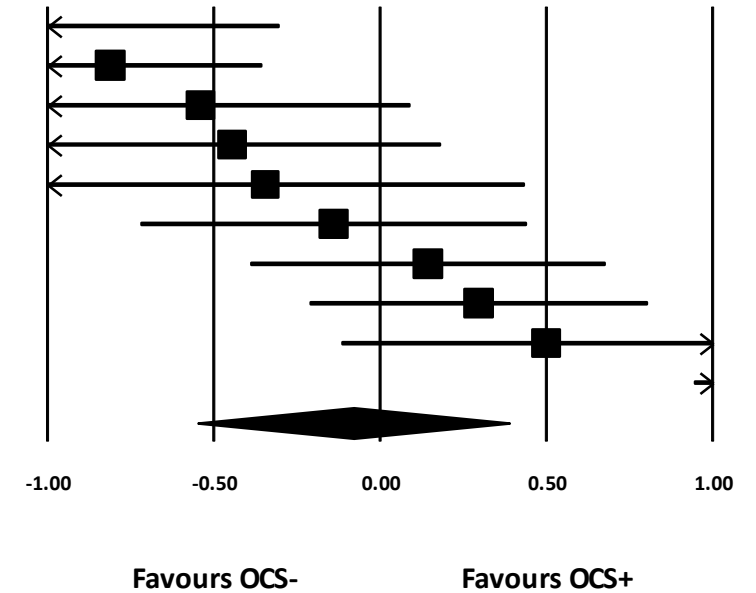

Figure 19 Forest plot set shifting: WCST

| Study name         | Subgroup within study | Outcome                   | Statistics for each study |                |          |             |             | Std diff in means and 95% CI |         |
|--------------------|-----------------------|---------------------------|---------------------------|----------------|----------|-------------|-------------|------------------------------|---------|
|                    |                       |                           | Std diff in means         | Standard error | Variance | Lower limit | Upper limit | Z-Value                      | p-Value |
| Hwang 2000         | Blank                 | WCST categories completed | -1.105                    | 0.480          | 0.231    | -2.046      | -0.164      | -2.302                       | 0.021   |
| Lysaker 2004       | Combined              | WCST categories completed | -0.872                    | 0.275          | 0.076    | -1.411      | -0.333      | -3.172                       | 0.002   |
| Manheim study      | Blank                 | WCST categories completed | -0.413                    | 0.227          | 0.051    | -0.857      | 0.031       | -1.823                       | 0.068   |
| Lysaker 2000       | Blank                 | WCST categories completed | -0.366                    | 0.298          | 0.089    | -0.951      | 0.219       | -1.227                       | 0.220   |
| Kazhungil 2017     | Blank                 | WCST categories completed | -0.197                    | 0.259          | 0.067    | -0.705      | 0.310       | -0.763                       | 0.446   |
| Michalopoulou 2014 | Blank                 | WCST categories completed | -0.150                    | 0.317          | 0.100    | -0.770      | 0.471       | -0.473                       | 0.636   |
| Ongur 2005         | Blank                 | WCST categories completed | -0.127                    | 0.285          | 0.081    | -0.686      | 0.431       | -0.448                       | 0.654   |
| Berman 1998        | Blank                 | WCST categories completed | -0.038                    | 0.366          | 0.134    | -0.756      | 0.679       | -0.105                       | 0.916   |
| Hermesh 2003       | Blank                 | WCST categories completed | 0.095                     | 0.317          | 0.100    | -0.526      | 0.716       | 0.301                        | 0.763   |
| Kumbhani 2010      | Blank                 | WCST categories completed | 0.100                     | 0.393          | 0.154    | -0.670      | 0.870       | 0.255                        | 0.799   |
| Kim 2015           | Combined              | WCST categories completed | 0.207                     | 0.202          | 0.041    | -0.190      | 0.604       | 1.023                        | 0.306   |
| Tumkaya 2009       | Blank                 | WCST categories completed | 0.578                     | 0.315          | 0.099    | -0.040      | 1.197       | 1.834                        | 0.067   |
|                    |                       |                           | -0.168                    | 0.122          | 0.015    | -0.407      | 0.071       | -1.375                       | 0.169   |

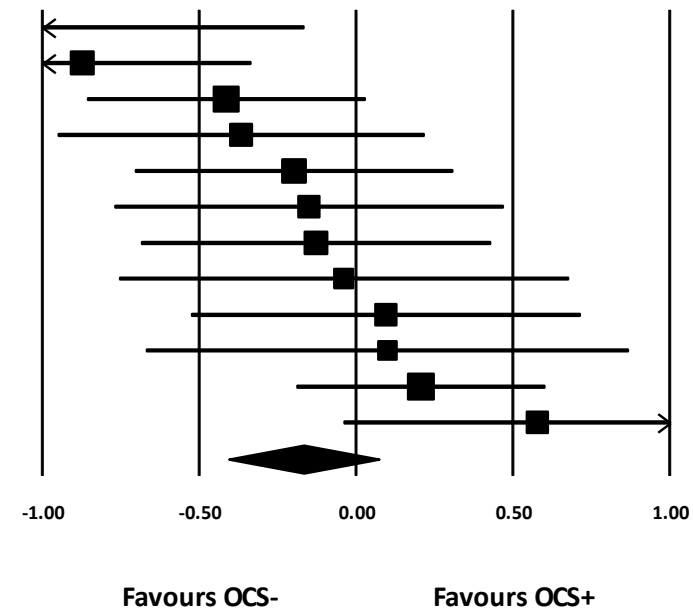

Figure 20 Forest plot abstract thinking

| Study name   | Subgroup within study | Outcome        | Statistics for each study |                |          |             |             | Std diff in means and 95% CI |         |
|--------------|-----------------------|----------------|---------------------------|----------------|----------|-------------|-------------|------------------------------|---------|
|              |                       |                | Std diff in means         | Standard error | Variance | Lower limit | Upper limit | Z-Value                      | p-Value |
| Sahoo 2018   | Blank                 | ToL 3 minmoves | -0.605                    | 0.230          | 0.053    | -1.056      | -0.154      | -2.627                       | 0.009   |
| Patel 2010   | Blank                 | SoC            | -0.580                    | 0.390          | 0.152    | -1.344      | 0.184       | -1.489                       | 0.137   |
| Veerman 2016 | Blank                 | OTS            | -0.280                    | 0.357          | 0.127    | -0.978      | 0.419       | -0.784                       | 0.433   |
| Kontis 2016  | Blank                 | SoC            | 0.447                     | 0.223          | 0.050    | 0.010       | 0.884       | 2.003                        | 0.045   |
|              |                       |                | -0.229                    | 0.293          | 0.086    | -0.802      | 0.345       | -0.782                       | 0.434   |

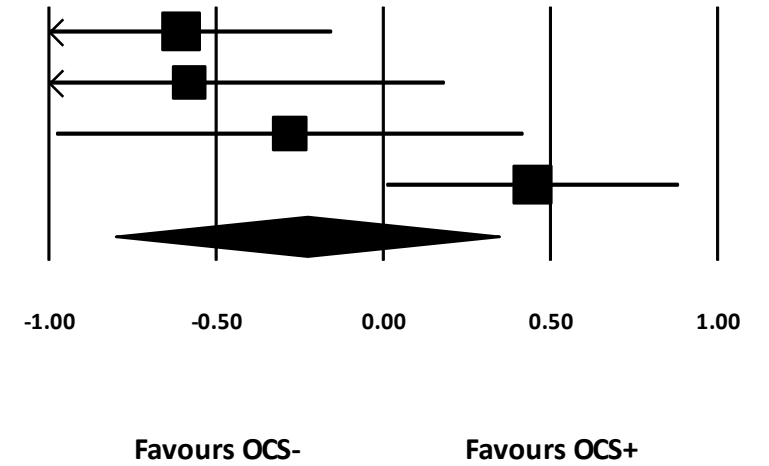

Figure 21 Forest plot planning

| Study name     | Subgroup within study | Outcome                  | Statistics for each study |                |          |             |             |         |         |
|----------------|-----------------------|--------------------------|---------------------------|----------------|----------|-------------|-------------|---------|---------|
|                |                       |                          | Std diff in means         | Standard error | Variance | Lower limit | Upper limit | Z-Value | p-Value |
| Wang 2019      | Blank                 | WAIS similarities        | -1.143                    | 0.333          | 0.111    | -1.796      | -0.490      | -3.431  | 0.001   |
| Berman 1998    | Blank                 | WAIS similarities        | -0.937                    | 0.385          | 0.149    | -1.693      | -0.182      | -2.431  | 0.015   |
| Hermesh 2003   | Blank                 | Raven                    | -0.382                    | 0.319          | 0.102    | -1.009      | 0.244       | -1.197  | 0.231   |
| Tonna 2019     | Blank                 | MATRICS mazes            | -0.000                    | 0.258          | 0.066    | -0.505      | 0.505       | -0.001  | 0.999   |
| Lee 2009       | Blank                 | WAIS picture arrangement | 0.308                     | 0.401          | 0.161    | -0.478      | 1.093       | 0.768   | 0.443   |
| Kazhungil 2017 | Blank                 | WAIS color matrices      | 0.362                     | 0.260          | 0.068    | -0.148      | 0.872       | 1.391   | 0.164   |
|                |                       |                          | -0.281                    | 0.253          | 0.064    | -0.776      | 0.214       | -1.114  | 0.265   |

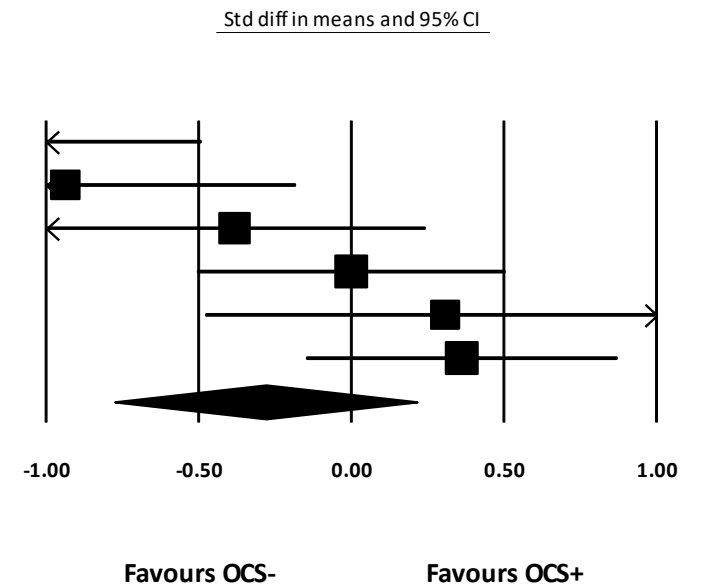

Figure 22 Forest plot reasoning



### e. Forest plot facial affect recognition

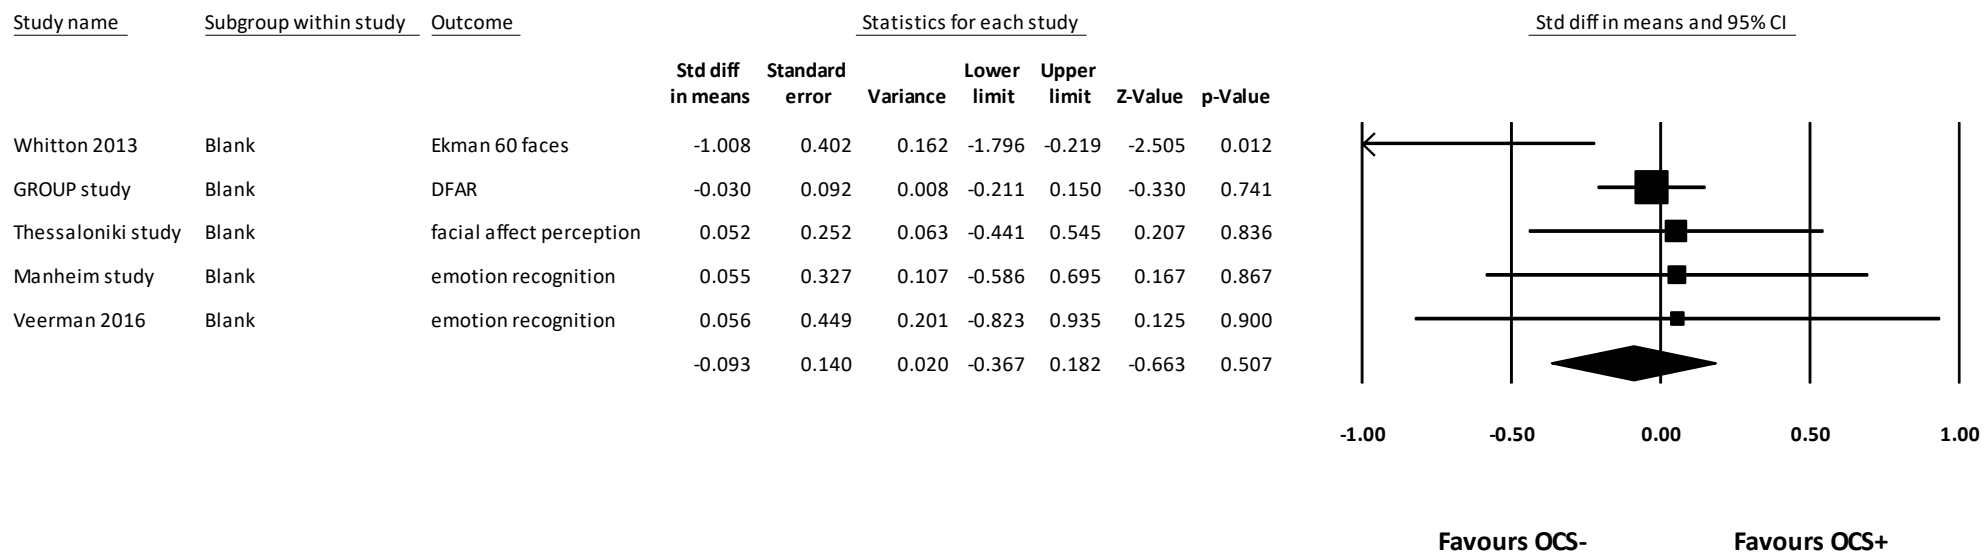

Figure 23 Forest plot facial affect recognition

### f. Forest plot visual spatial ability

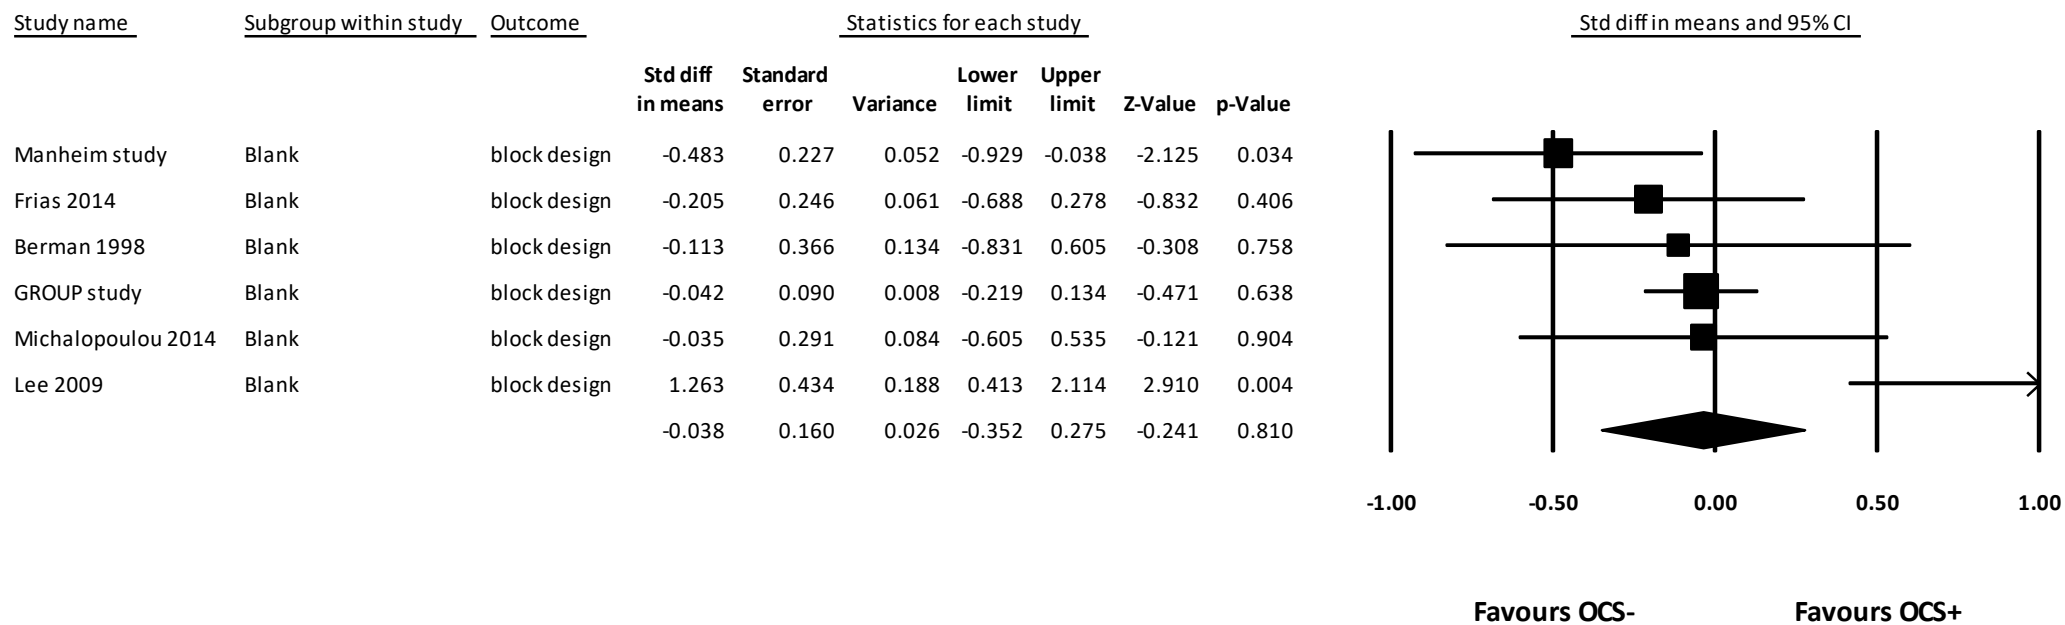

Figure 24 Forest plot visual spatial ability

## 7. Confounders per subgroup

Below you will find a descriptive table of the confounders age, percentage males, mean PANSS positive score, percentage on clozapine and mean YBOCS for the OCS- and OCS+ group within each study separately. Note that not all of these values can be found in the original publication, as some were provided to us by the authors.

| Author & Year     | Subgroup           | Age   | SD    | % male | PANSS positive | SD   | % on clozapine | YBOCS score | SD   |
|-------------------|--------------------|-------|-------|--------|----------------|------|----------------|-------------|------|
| Berman 1998       | OCS+               | 52.1  | 10.7  |        | 22.1           | 5.6  |                | 19.9        | 6.3  |
|                   | OCS-               | 49.4  | 11.7  |        | 19.8           | 6.3  |                | 0           |      |
| Bleich-Cohen 2014 | OCS+               | 27.3  | 3.4   | 62.5   |                |      | 0              | 20.2        | 8.2  |
|                   | OCS-               | 25.7  | 2.3   | 64.7   |                |      | 0              | 0.2         | 0.7  |
| Borkowska 2003    | OCS+               | 26    | 6     | 61.5   |                |      |                | 23          | 4    |
|                   | OCS-               | 33    | 10    | 53.3   |                |      |                |             |      |
| Focseneanu 2016   | OCS+               | 23.64 | 1.76  | 47.1   | 19.88          | 5.94 |                | 23.11       | 6.06 |
|                   | OCS-               | 23.3  | 2.39  | 19.2   | 26.57          | 4.47 |                | 0           |      |
| Frias 2014        | OCS+               | 37.03 | 14.40 | 53.3   | 16.63          | 7.01 | 16.7           | 18.67       | 7.54 |
|                   | OCS-               | 32.41 | 10.09 | 59.5   | 15.49          | 5.03 | 5.4            |             |      |
| GROUP study       | OCS+               | 26.46 | 7.98  | 76.8   | 16.79          | 6.96 | 21.9           | 14.64       | 5.54 |
|                   | OCS-               | 27.78 | 7.97  | 76.0   | 13.44          | 6.37 | 12.2           | 0.34        | 1.34 |
| Hamid 2010        | OCS+               | 31.47 | 12.2  | 73.3   |                |      |                |             |      |
|                   | OCS-               | 36.73 | 9.7   | 58.8   |                |      |                |             |      |
| Hermesh 2003      | OCS+               | 31.7  | 10.4  | 100    |                |      |                | 21.5        | 7.3  |
|                   | OCS-               | 32.5  | 13.4  | 100    |                |      |                |             |      |
| Hwang 2000        | OCS+               | 35.7  |       | 90     | 24.1           | 4.8  |                | 27.9        | 3.4  |
|                   | OCS-               | 38.3  |       | 90     | 23.3           | 7.1  |                | 1.0         | 1.3  |
| Kazhungil 2017    | OCS+               | 29.1  | 7.2   | 56.7   | 17.93          | 6.30 | 13             | 24.40       | 4.91 |
|                   | OCS-               | 28.7  | 7.1   | 56.7   | 23.20          | 5.47 | 0              |             |      |
| Kumbhani 2010     | All                | 40.69 | 10.79 | 51.7   |                |      |                |             |      |
| Kim 2015          | OCS+ <5            | 24.6  | 5.4   | 38.5   | 19.5           | 6.3  |                |             |      |
|                   | OCS+ >5            | 37.8  | 7.0   | 41.2   | 21.6           | 7.1  |                |             |      |
|                   | OCS- <5            | 29.6  | 8.2   | 56.6   | 15             | 6.4  |                |             |      |
|                   | OCS- >5            | 36.7  | 8.0   | 51.2   | 17.3           | 6.2  |                |             |      |
| Kontis 2016       | OCS+               | 40.48 | 9.19  | 63.6   | 18.00          | 6.84 | 18.2           | 18.09       | 6.45 |
|                   | OCS-               | 43.57 | 10.45 | 63.6   | 18.70          | 9.27 | 9.1            | 1.14        | 2.38 |
| Lee 2009          | OCS+               | 30.30 | 7.79  | 70     | 13.40          | 3.71 | 40             | 14.00       | 6.34 |
|                   | OCS-               | 30.47 | 5.39  | 58.8   | 12.41          | 3.97 | 35.3           |             |      |
| Lysaker 2000      | OCS+               | 39.1  | 10.2  | 71.4   | 20.4           | 6.3  |                |             |      |
|                   | OCS-               | 40.8  | 9.7   | 92.0   | 15.3           | 5.7  |                |             |      |
| Lysaker 2002      | OCS+               |       |       |        |                |      |                | 22          | 4    |
|                   | OCS-               |       |       |        |                |      |                | 2.9         | 5    |
| Lysaker 2004      | OCS+ good function | 46    | 11    | 100    | 21             | 4.2  |                | 18          | 6.6  |

|                    |                        |       |       |       |       |      |       |       |      |
|--------------------|------------------------|-------|-------|-------|-------|------|-------|-------|------|
|                    | OCS+ poor function     | 49    | 8     | 100   | 18    | 5.7  |       | 21    | 5.4  |
|                    | OCS- moderate function | 44    | 9     | 100   | 17.7  | 6.9  |       | 2     | 3.1  |
|                    | OCS- poor function     | 45    | 9     | 100   | 19    | 4.2  |       | 2     | 3.2  |
| Manheim study      | OCS+                   | 39.7  | 10.8  | 73.0  | 13.9  | 2.7  | 59.5  | 16.5  | 5.7  |
|                    | OCS-                   | 35.8  | 10.0  | 67.4  | 13.3  | 3.1  | 16.3  | 1.34  | 2.55 |
| Michalopoulou 2014 | OCS+                   | 35.3  | 9.6   | 50    | 9.9   | 3.2  | 15    | 20.1  | 4.4  |
|                    | OCS-                   | 37.5  | 10.9  | 50    | 11.2  | 2.9  | 10    |       |      |
| Ntouros 2014       | OCS+                   | 26.42 | 6.33  | 73.7  | 15.36 | 4.18 | 0     | 9.86  | 5.43 |
|                    | OCS-                   | 26.33 | 4.51  | 88.9  | 13.81 | 3.88 | 0     | 0     | 0    |
| Ongur 2005         | OCS+                   | 42.4  | 10.0  | 71.6  | 20.38 | 1.79 | 54.5  |       |      |
|                    | OCS-                   | 43.98 | 9.18  | 75.92 | 14.14 | 0.88 | 58.89 |       |      |
| Patel 2010         | OCS+                   | 36.0  | 10.7  | 83    |       |      | 100   | 18.0  | 9.6  |
|                    | OCS-                   | 37.9  | 12.7  | 75    |       |      | 100   | 2.43  | 6.8  |
| Sahoo 2018         | OCS+                   | 33.47 | 11.22 | 57.5  | 11.97 | 3.56 | 65    | 17.92 | 5.20 |
|                    | OCS-                   | 32.87 | 9.09  | 41.02 | 11.20 | 3.40 | 69.2  | 0.87  | 0.83 |
| Tiryaki 2010       | OCS+                   | 33.95 | 8.47  | 75    |       |      | 30    | 14.82 | 6.0  |
|                    | OCS-                   | 33.54 | 9.20  | 77.3  |       |      | 22.7  |       |      |
| Tonna 2019         | OCS+                   | 40.48 | 12.61 | 63.0  | 14.70 | 5.92 | 18.5  | 20.96 | 9.23 |
|                    | OCS-                   | 36.88 | 12.28 | 73.5  | 15.00 | 6.01 | 8.8   | 1.44  | 2.43 |
| Tumkaya 2009       | OCS+                   | 33.37 | 13.37 | 68.8  |       |      | 0     | 23.00 | 8.39 |
|                    | OCS-                   | 38.63 | 10.72 | 56.7  |       |      | 13.3  |       |      |
| Veerman 2016       | OCS+                   | 42.82 | 9.06  | 63.6  | 22.55 | 9.51 | 100   | 19.18 | 9.27 |
|                    | OCS-                   | 42.22 | 9.78  | 78.0  | 20.61 | 5.27 | 100   | 0.59  | 1.52 |
| Wang 2019          | OCS+                   | 22.00 | 4.83  | 63.6  |       |      | 0     |       |      |
|                    | OCS-                   | 21.50 | 3.95  | 60.0  |       |      | 0     |       |      |
| Whitney 2003       | OCS+                   | 45.08 | 8.13  | 92.3  | 19.58 | 5    |       | 16.08 | 6.57 |
|                    | OCS-                   | 44    | 9.44  | 100   | 18.39 | 5.7  |       | 0.57  | 1.71 |
| Whitton 2013       | All                    | 43.6  | 9.8   | 41    |       |      |       |       |      |

Means and standard deviations (SD) or percentages of confounders per group. OCS+ = people with obsessive-compulsive symptoms. OCS- = people without obsessive-compulsive symptoms. <5 = duration of psychotic illness less than 5 years. >5 = duration of psychotic illness more than 5 years.

## 8. Meta-regression tables

Below you can find the values entered as covariates into the meta-regression and the statistics for the 19 meta-regressions we conducted. P-values for coefficients lower than 0.05 are marked in bold.

| Author & Year      | Subgroup               | YBOCS OCS+ | OCS/OCD | Mean age in years | Mean PANSS positive |
|--------------------|------------------------|------------|---------|-------------------|---------------------|
| Berman 1998        |                        | 19.9       | OCS = 0 | 50.66             | 20.87               |
| Bleich-Cohen 2014  |                        | 20.2       | OCD = 1 | 26.48             |                     |
| Borkowska 2003     |                        | 23         | OCD = 1 | 29.75             |                     |
| Focseneanu 2016    |                        | 23.11      | OCD = 1 | 23.43             | 23.93               |
| Frias 2014         |                        | 18.67      | OCD = 1 | 34.48             | 16.00               |
| GROUP study        |                        | 14.64      | OCS = 0 | 27.62             | 13.92               |
| Hamid 2010         |                        |            | OCD = 1 | 35.94             |                     |
| Hermesh 2003       |                        | 21.5       | OCD = 1 | 32.08             |                     |
| Hwang 2000         |                        | 27.9       | OCS = 0 | 37                | 23.7                |
| Kazhungil 2017     |                        | 24.4       | OCD = 1 | 28.9              | 20.56               |
| Kim 2015           | <5 years DOI           |            | OCS = 0 | 28.62             | 15.89               |
| Kim 2015           | >5 years DOI           |            | OCS = 0 | 36.89             | 18.05               |
| Kontis 2016        |                        | 18.09      | OCS = 0 | 42.64             | 18.49               |
| Kumbhani           |                        |            | OCS = 0 | 40.69             |                     |
| Lee 2009           |                        | 14         | OCD = 1 | 30.41             | 12.78               |
| Lysaker 2000       |                        |            | OCS = 0 | 40.02             | 17.63               |
| Lysaker 2002       |                        | 22         | OCS = 0 | 42.2              |                     |
| Lysaker 2004       | Good/moderate function | 18         | OCS = 0 | 44.62             | 18.72               |
| Lysaker 2004       | Poor function          | 21         | OCS = 0 | 46.30             | 18.68               |
| Manheim study      |                        | 16.5       | OCS = 0 | 37.60             | 13.58               |
| Michalopoulou 2014 |                        | 20.1       | OCD= 1  | 36.4              | 10.55               |
| Ntouros 2014       |                        | 9.86       | OCS= 0  | 26.38             | 14.72               |
| Ongur 2005         |                        |            | OCS = 0 | 43.79             | 14.88               |
| Patel 2010         |                        | 18         | OCD = 1 | 37.09             |                     |
| Sahoo 2018         |                        | 17.92      | OCD = 1 | 33.17             | 11.59               |
| Tiryaki 2010       |                        | 14.82      | OCD =1  | 33.69             |                     |
| Tonna 2019         |                        | 20.96      | OCS = 0 | 38.47             | 14.87               |
| Tumkaya 2009       |                        | 23         | OCD = 1 | 36.80             |                     |
| Veerman 2016       |                        | 19.18      | OCS = 0 | 42.34             | 21.01               |
| Wang 2019          |                        |            | OCD = 1 | 21.76             |                     |
| Whitney 2003       |                        | 16.08      | OCS = 0 | 44.52             | 18.96               |
| Whitton 2013       |                        |            | OCS = 0 | 43.6              |                     |

Values entered as covariates into meta-regression. DOI = duration of illness. YBOCS OCS+ = the mean YBOCS score of the comorbid group. OCS/OCD= whether the criterion for the comorbid group was a full diagnosis of OCD or only OCS.

| Covariate               | N studies | Covariate                                                                         | Coefficient | SE     | 95% lower | 95% upper | 2-sided p-value |
|-------------------------|-----------|-----------------------------------------------------------------------------------|-------------|--------|-----------|-----------|-----------------|
| <b>Processing speed</b> |           |                                                                                   |             |        |           |           |                 |
| Age                     | 12        | <b>Intercept</b>                                                                  | 0.7278      | 0.4229 | -0.1011   | 15.568    | 0.0853          |
|                         |           | <b>Age</b>                                                                        | -0.0281     | 0.0129 | -0.0533   | -0.0028   | <b>0.0292</b>   |
|                         |           | I <sup>2</sup> = 13.64%<br>R <sup>2</sup> analog = 0.70                           |             |        |           |           |                 |
| OCD                     | 12        | <b>Intercept</b>                                                                  | -0.2363     | 0.126  | -0.4832   | 0.0105    | 0.0606          |
|                         |           | <b>OCD</b>                                                                        | 0.101       | 0.1885 | -0.2683   | 0.4704    | 0.5918          |
|                         |           | I <sup>2</sup> = 42.33%<br>R <sup>2</sup> analog = 0.00 (computed value is -0.39) |             |        |           |           |                 |
| YBOCS<br>OCS<br>group   | 10        | <b>Intercept</b>                                                                  | -0.6316     | 0.6552 | -19.158   | 0.6526    | 0.335           |
|                         |           | <b>YBOCS OCS</b>                                                                  | 0.0229      | 0.0343 | -0.0445   | 0.0902    | 0.5059          |
|                         |           | I <sup>2</sup> = 53.74%<br>R <sup>2</sup> analog = 0.00 (computed value is -0.48) |             |        |           |           |                 |

SE= Standard Error, 95% lower = lower limit of the 95% confidence interval, 95% upper = upper limit of the 95% confidence interval

| Covariate                      | N studies | Covariate                                                                         | Coefficient | SE     | 95% lower | 95% upper | 2-sided p-value |
|--------------------------------|-----------|-----------------------------------------------------------------------------------|-------------|--------|-----------|-----------|-----------------|
| <b>Immediate visual memory</b> |           |                                                                                   |             |        |           |           |                 |
| Age                            | 11        | <b>Intercept</b>                                                                  | -0.3412     | 0.9016 | -21.083   | 14.259    | 0.7051          |
|                                |           | <b>Age</b>                                                                        | 0.008       | 0.0228 | -0.0367   | 0.0527    | 0.7261          |
|                                |           | I <sup>2</sup> = 54.55%<br>R <sup>2</sup> analog = 0.00 (computed value is -0.15) |             |        |           |           |                 |
| OCD                            | 11        | <b>Intercept</b>                                                                  | -0.0519     | 0.1629 | -0.3713   | 0.2674    | 0.7499          |
|                                |           | <b>OCD</b>                                                                        | 0.0698      | 0.2787 | -0.4765   | 0.6161    | 0.8022          |
|                                |           | I <sup>2</sup> = 55.62%<br>R <sup>2</sup> analog = 0.00 (computed value is -0.21) |             |        |           |           |                 |
| YBOCS<br>OCS<br>group          | 11        | <b>Intercept</b>                                                                  | -0.6403     | 0.8607 | -23.273   | 10.467    | 0.4569          |
|                                |           | <b>YBOCS OCS</b>                                                                  | 0.0313      | 0.0436 | -0.0542   | 0.1168    | 0.4728          |
|                                |           | I <sup>2</sup> = 52.81%<br>R <sup>2</sup> analog = 0.00 (computed value is -0.09) |             |        |           |           |                 |

SE= Standard Error, 95% lower = lower limit of the 95% confidence interval, 95% upper = upper limit of the 95% confidence interval

| Covariate             | N studies | Covariate                                                                         | Coefficient | SE     | 95% lower | 95% upper | 2-sided p-value |
|-----------------------|-----------|-----------------------------------------------------------------------------------|-------------|--------|-----------|-----------|-----------------|
| <b>Working memory</b> |           |                                                                                   |             |        |           |           |                 |
| Age                   | 15        | <b>Intercept</b>                                                                  | 0.9334      | 0.455  | 0.0417    | 18.252    | 0.0402          |
|                       |           | <b>Age</b>                                                                        | -0.0281     | 0.013  | -0.0536   | -0.0026   | <b>0.0308</b>   |
|                       |           | I <sup>2</sup> = 38.40%<br>R <sup>2</sup> analog = 0.11                           |             |        |           |           |                 |
| OCD                   | 15        | <b>Intercept</b>                                                                  | -0.1738     | 0.1123 | -0.3938   | 0.0463    | 0.1217          |
|                       |           | <b>OCD</b>                                                                        | 0.3254      | 0.1703 | -0.0083   | 0.6591    | 0.056           |
|                       |           | I <sup>2</sup> = 38.53%<br>R <sup>2</sup> analog = 0.15                           |             |        |           |           |                 |
| PANSS positive        | 11        | <b>Intercept</b>                                                                  | 0.5322      | 0.4823 | -0.4131   | 14.776    | 0.2698          |
|                       |           | <b>PANSS positive</b>                                                             | -0.038      | 0.0296 | -0.0961   | 0.0201    | 0.1998          |
|                       |           | I <sup>2</sup> = 33.06%<br>R <sup>2</sup> analog = 0.00 (computed value is -0.04) |             |        |           |           |                 |
| YBOCS OCS group       | 12        | <b>Intercept</b>                                                                  | 0.3475      | 0.5847 | -0.7985   | 14.936    | 0.5523          |
|                       |           | <b>YBOCS OCS</b>                                                                  | -0.0188     | 0.0309 | -0.0794   | 0.0418    | 0.543           |
|                       |           | I <sup>2</sup> = 35.59%<br>R <sup>2</sup> analog = 0.00 (computed value is -0.62) |             |        |           |           |                 |

SE= Standard Error, 95% lower = lower limit of the 95% confidence interval, 95% upper = upper limit of the 95% confidence interval

| Covariate           | N studies | Covariate                                                                         | Coefficient | SE     | 95% lower | 95% upper | 2-sided p-value |
|---------------------|-----------|-----------------------------------------------------------------------------------|-------------|--------|-----------|-----------|-----------------|
| <b>Set shifting</b> |           |                                                                                   |             |        |           |           |                 |
| Age                 | 13        | <b>Intercept</b>                                                                  | -1.107      | 13.093 | -36.733   | 14.592    | 0.3978          |
|                     |           | <b>Age</b>                                                                        | 0.0266      | 0.0349 | -0.0418   | 0.0949    | 0.4462          |
|                     |           | I <sup>2</sup> = 81.63%<br>R <sup>2</sup> analog = 0.00 (computed value is -0.40) |             |        |           |           |                 |
| OCD                 | 13        | <b>Intercept</b>                                                                  | -0.0617     | 0.2154 | -0.4839   | 0.3606    | 0.7746          |
|                     |           | <b>OCD</b>                                                                        | -0.1429     | 0.3533 | -0.8353   | 0.5495    | 0.6859          |
|                     |           | I <sup>2</sup> = 81.60%<br>R <sup>2</sup> analog = 0.00 (computed value is -0.15) |             |        |           |           |                 |
| YBOCS OCS group     | 10        | <b>Intercept</b>                                                                  | -0.0479     | 0.869  | -1.751    | 16.553    | 0.9561          |
|                     |           | <b>YBOCS OCS</b>                                                                  | -0.01       | 0.0437 | -0.0957   | 0.0757    | 0.8194          |
|                     |           | I <sup>2</sup> = 74.28%<br>R <sup>2</sup> analog = 0.00 (computed value is -0.36) |             |        |           |           |                 |

SE= Standard Error, 95% lower = lower limit of the 95% confidence interval, 95% upper = upper limit of the 95% confidence interval

| Covariate                   | N studies | Covariate                                               | Coefficient | SE     | 95% lower | 95% upper | 2-sided p-value |
|-----------------------------|-----------|---------------------------------------------------------|-------------|--------|-----------|-----------|-----------------|
| <b>Cognitive inhibition</b> |           |                                                         |             |        |           |           |                 |
| Age                         | 10        | <b>Intercept</b>                                        | 13.205      | 0.6848 | -0.0216   | 26.627    | 0.0538          |
|                             |           | <b>Age</b>                                              | -0.0444     | 0.0197 | -0.0831   | -0.0058   | <b>0.0242</b>   |
|                             |           | I <sup>2</sup> = 36.11%<br>R <sup>2</sup> analog = 0.59 |             |        |           |           |                 |
| OCD                         | 10        | <b>Intercept</b>                                        | -0.6025     | 0.2037 | -10.017   | -0.2033   | 0.0031          |
|                             |           | <b>OCD</b>                                              | 0.5867      | 0.2459 | 0.1047    | 10.687    | <b>0.017</b>    |
|                             |           | I <sup>2</sup> = 33.10%<br>R <sup>2</sup> analog = 0.63 |             |        |           |           |                 |

SE= Standard Error, 95% lower = lower limit of the 95% confidence interval, 95% upper = upper limit of the 95% confidence interval

| Covariate                    | N studies | Covariate                                               | Coefficient | SE     | 95% lower | 95% upper | 2-sided p-value |
|------------------------------|-----------|---------------------------------------------------------|-------------|--------|-----------|-----------|-----------------|
| <b>Cognitive flexibility</b> |           |                                                         |             |        |           |           |                 |
| Age                          | 12        | <b>Intercept</b>                                        | 18.825      | 0.8569 | 0.2031    | 3.562     | 0.028           |
|                              |           | <b>Age</b>                                              | -0.0577     | 0.0239 | -0.1045   | -0.011    | <b>0.0155</b>   |
|                              |           | I <sup>2</sup> = 73.33%<br>R <sup>2</sup> analog = 0.34 |             |        |           |           |                 |
| OCD                          | 12        | <b>Intercept</b>                                        | -0.4826     | 0.2822 | -10.356   | 0.0705    | 0.0872          |
|                              |           | <b>OCD</b>                                              | 0.5663      | 0.3682 | -0.1555   | 1.288     | 0.1241          |
|                              |           | I <sup>2</sup> = 79.58%<br>R <sup>2</sup> analog = 0.02 |             |        |           |           |                 |

SE= Standard Error, 95% lower = lower limit of the 95% confidence interval, 95% upper = upper limit of the 95% confidence interval

| Covariate                | N studies | Covariate                                               | Coefficient | SE     | 95% lower | 95% upper | 2-sided p-value |
|--------------------------|-----------|---------------------------------------------------------|-------------|--------|-----------|-----------|-----------------|
| <b>Abstract thinking</b> |           |                                                         |             |        |           |           |                 |
| Age                      | 12        | <b>Intercept</b>                                        | 0.5925      | 0.8073 | -0.9897   | 21.748    | 0.463           |
|                          |           | <b>Age</b>                                              | -0.0199     | 0.0209 | -0.0608   | 0.0211    | 0.341           |
|                          |           | I <sup>2</sup> = 49.10%<br>R <sup>2</sup> analog = 0.05 |             |        |           |           |                 |
| OCD                      | 12        | <b>Intercept</b>                                        | -0.2859     | 0.1472 | -0.5745   | 0.0027    | 0.0521          |
|                          |           | <b>OCD</b>                                              | 0.3533      | 0.2544 | -0.1452   | 0.8518    | 0.1648          |
|                          |           | I <sup>2</sup> = 48.76%<br>R <sup>2</sup> analog = 0.07 |             |        |           |           |                 |

SE= Standard Error, 95% lower = lower limit of the 95% confidence interval, 95% upper = upper limit of the 95% confidence interval



| 9. Publication bias                     | Rosenthal's N | Orwin's N | Trim & fill N imputed | Point estimate Trim & fill | Original point estimate | Funnel plot   |
|-----------------------------------------|---------------|-----------|-----------------------|----------------------------|-------------------------|---------------|
| <b>Attention</b>                        |               |           |                       |                            |                         |               |
| Processing speed                        | 1             | 28        | 0                     | NA                         | -0.133                  | Minor bias    |
| *Processing speed: TMTA                 | 0             | 27        | 1                     | -0.22902                   | -0.177                  | Minor bias    |
| **Processing speed: not purely RT based | 11            | 27        | 1                     | -0.22668                   | -0.190                  | Minor bias    |
| **Processing speed: purely RT based     | 0             | 10        | 0                     | NA                         | -0.105                  | Minor bias    |
| Sustained attention                     | 0             | 7         | 0                     | NA                         | -0.107                  | Evenly spread |
| <b>Memory</b>                           |               |           |                       |                            |                         |               |
| Working memory                          | 0             | NA        | 0                     | NA                         | -0.030                  | Evenly spread |
| *Working memory: digit span             | 0             | 10        | 0                     | NA                         | -0.097                  | Evenly spread |
| Immediate visual memory                 | 0             | NA        | 0                     | NA                         | -0.03                   | Evenly spread |
| Delayed visual memory                   | 0             | 1         | 1                     | 0.02056                    | 0.051                   | Minor bias    |
| Trial 1 verbal memory                   | 0             | 7         | 2                     | -0.03230                   | 0.224                   | Minor bias    |
| Sum of trials verbal memory             | 0             | NA        | 1                     | 0.0495                     | -0.035                  | Evenly spread |
| Delayed verbal memory                   | 0             | NA        | 2                     | 0.06343                    | 0.023                   | Minor bias    |
| <b>Executive function</b>               |               |           |                       |                            |                         |               |
| Fluency                                 | 0             | 26        | 2                     | -0.31561                   | -0.123                  | Minor bias    |
| Cognitive inhibition                    | 3             | 29        | 1                     | -0.26269                   | -0.208                  | Some bias     |
| *Cognitive inhibition: Stroop           | 2             | 26        | 1                     | -0.26269                   | -0.208                  | Some bias     |
| Cognitive flexibility                   | 2             | 38        | 3                     | -0.37413                   | -0.150                  | Some bias     |
| *Cognitive flexibility: TMTB seconds    | 0             | 23        | 3                     | -0.48077                   | -0.152                  | Some bias     |
| Set shifting                            | 0             | NA        | 2                     | 0.02235                    | -0.111                  | Minor bias    |
| *Set shifting: WCST                     | 0             | NA        | 2                     | 0.1353                     | -0.081                  | Minor bias    |
| Abstract thinking                       | 1             | 26        | 1                     | -0.23509                   | -0.168                  | Some bias     |
| Planning                                | 0             | 9         | 1                     | -0.07998                   | -0.229                  | Minor bias    |
| Reasoning                               | 1             | 20        | 1                     | -0.1115                    | -0.281                  | Minor bias    |
| <b>Other</b>                            |               |           |                       |                            |                         |               |
| Facial affect recognition               | 0             | 1         | 1                     | -0.09539                   | -0.093                  | Some bias     |
| Visual spatial ability                  | 0             | 3         | 2                     | 0.17002                    | -0.038                  | Some bias     |

Statistics relating to publication bias. For Orwin's N the effect size was set at 0 with a threshold of (-)0.05. When the effect size was already below 0.05 studies are marked NA. Trim and fill shows the number of imputed studies and the funnel plots shows the result of visual inspection. Rows marked with \* are subgroup analyses on specific cognitive tests done as sensitivity analyses. Results marked with \*\* are post-hoc subgroup analyses.

## 10. Results not included in meta-analysis

Below you can find a table with an overview of results from cognitive tests that were mentioned in the primary studies that could be grouped into a domain, but that did not occur 4 times and therefore were not included in the meta-analysis.

|                        | Subgroup     | N subjects | Cognitive task                 | Score used       | Mean         | SD             | Correlation coefficient |                                        |
|------------------------|--------------|------------|--------------------------------|------------------|--------------|----------------|-------------------------|----------------------------------------|
| <b>Gambling task</b>   |              |            |                                |                  |              |                |                         |                                        |
| Kazhungil 2017         | OCS+<br>OCS- | 30<br>30   | Iowa Gambling Task             | IGT difference   | 2.13<br>7.93 | 18.66<br>24.99 |                         | OCS- performed better                  |
| Patel 2010             | OCS+         | 12         | CANTAB Cambridge Gambling Task | risk taking      | 0.54         | 0.17           |                         | OCS+ took more risk and longer latency |
|                        | OCS-         | 16         |                                | decision latency | 4.95         | 3.41           |                         |                                        |
| Whitney 2003           | OCS+         | 26         | Bechara Gambling Task          | risk taking      | 0.48         | 0.17           |                         |                                        |
|                        | OCS-         | 28         |                                | decision latency | 4.80         | 2.86           |                         |                                        |
|                        | OCS+         | 26         |                                | advantageous-    | -3.46        | 24.54          |                         | OCS- performed better                  |
|                        | OCS-         | 28         |                                | disadvantageous  | -1.14        | 28.05          |                         |                                        |
| <b>Verbal learning</b> |              |            |                                |                  |              |                |                         |                                        |
| Kim 2015               | OCS+<5       | 13         | RAVLT                          | n learning index | 6.1          | 2.7            |                         | OCS+ performed better                  |
|                        | OCS-<5       | 53         |                                |                  | 4.3          | 2.4            |                         |                                        |
|                        | OCS+>5       | 17         |                                |                  | 5.1          | 2.7            |                         |                                        |
|                        | OCS->5       | 80         |                                |                  | 4.5          | 2.4            |                         |                                        |
| Tumkaya 2009           | OCS+         | 16         | RAVLT                          | learning         | 10.69        | 2.82           |                         | OCS+ performed better                  |
|                        | OCS-         | 30         |                                |                  | 10.30        | 3.06           |                         |                                        |
| Focseneanu 2016        | OCS+<br>OCS- | 17<br>26   | RAVLT                          | learning rate    | 9.41<br>5.23 | 7.26<br>4.24   |                         | OCS+ performed better                  |

|                           | Subgroup   | N subjects | Cognitive task                      | Score used                     | Mean  | SD   | Correlation coefficient |                       |
|---------------------------|------------|------------|-------------------------------------|--------------------------------|-------|------|-------------------------|-----------------------|
| <b>Theory of Mind</b>     |            |            |                                     |                                |       |      |                         |                       |
| Meijer 2013               | YBOCS=0    | 763        | Hinting task                        |                                | 18.5  | 2.1  |                         | OCS- slightly better  |
|                           | YBOCS=1-7  | 67         |                                     |                                | 18.6  | 2.1  |                         |                       |
|                           | YBOCS=8-15 | 100        |                                     |                                | 18.4  | 2.1  |                         |                       |
|                           | YBOCS=16+  | 54         |                                     |                                | 18.2  | 2.1  |                         |                       |
| Whitton 2013              |            | 34         | Mind in Eyes                        |                                |       |      | -0.17                   | OCS- performed better |
| Ntouros 2014              | OCS+       | 38         | Perception of Social Inference Test | ToM1                           | 22.13 | 4.69 |                         | OCS- performed better |
|                           | OCS-       | 27         |                                     | ToM2                           | 24.39 | 6.09 |                         |                       |
|                           |            |            |                                     | ToM1                           | 24.26 | 2.14 |                         |                       |
|                           |            |            |                                     | ToM2                           | 27.89 | 4.37 |                         |                       |
| <b>Verbal recognition</b> |            |            |                                     |                                |       |      |                         |                       |
| Lee 2009                  | OCS+       | 10         | RAVLT                               | delayed recognition            | 8.20  | 2.57 |                         | OCS+ performed better |
|                           | OCS-       | 17         |                                     |                                | 8.18  | 3.78 |                         |                       |
| Focseneanu 2016           | OCS+       | 17         | RAVLT                               | volume of recognitions correct | 12.00 | 3.33 |                         | OCS+ performed better |
|                           | OCS-       | 26         |                                     |                                | 11.19 | 3.26 |                         |                       |
| Veerman 2016              | OCS+       | 10         | CANTAB VRM                          | total correct recognition      | 20.40 | 3.20 |                         | OCS+ performed better |
|                           | OCS-       | 39         |                                     |                                | 19.49 | 3.38 |                         |                       |
